# Supplementary material
Source: PubMed Central journal article supplement (PMC9984530)
Supplement: 41746_2023_781_MOESM1_ESM.pdf [file 41746_2023_781_MOESM1_ESM.pdf]

## Supplementary Online Content

**Supplementary Figure 1.** Flowchart for the selection of the analyzed study sample from the UK Biobank Study

**Supplementary Figure 2.** Acceleration level during seven-day monitoring with fitted curve for the circadian rest-activity characteristics among participants without and with incident atrial fibrillation

**Supplementary Figure 3.** Standardized risk of incident atrial fibrillation according to genetic risk and amplitude

**Supplementary Figure 4.** Standardized risk of incident atrial fibrillation according to genetic risk and acrophase

**Supplementary Figure 5.** Standardized risk of incident atrial fibrillation according to genetic risk and pseudo-F

**Supplementary Figure 6.** Standardized risk of incident atrial fibrillation according to genetic risk and mesor

**Supplementary Figure 7.** Timeline of covariates collection

**Supplementary Figure 8.** Associations between circadian rest-activity characteristics and incident atrial fibrillation

**Supplementary Table 1.** Risk of Incident atrial fibrillation according to circadian rest-activity characteristics

**Supplementary Table 2.** Risk of Incident atrial fibrillation according to circadian rest-activity characteristics stratified by age categories

**Supplementary Table 3.** Risk of Incident atrial fibrillation according to circadian rest-activity characteristics stratified by sex categories

**Supplementary Table 4.** Risk of Incident atrial fibrillation according to genetic and circadian rest-activity characteristics

**Supplementary Table 5.** Sensitivity analysis on the association of circadian rest-activity characteristics and genetic risk with Incident atrial fibrillation by using competing risk regression (Fine and Gray)

**Supplementary Table 6.** Sensitivity analysis on the associations of circadian rest-activity characteristics and genetic risk with incident atrial fibrillation among participants without any missing covariate data

**Supplementary Table 7.** Sensitivity analysis on the associations of circadian rest-activity characteristics and genetic risk with incident atrial fibrillation by excluding events that occurred within the first year of follow-up

**Supplementary Table 8.** Sensitivity analysis on the associations of circadian rest-activity characteristics and genetic risk with atrial fibrillation by censoring up to Dec 31, 2019

**Supplementary Table 9.** Sensitivity analysis on the associations of circadian rest-activity characteristics and genetic risk with atrial fibrillation by excluding those reporting a history of shift work

**Supplementary Table 10.** Risk of incident atrial fibrillation according to circadian rest-activity characteristics within each genetic risk category

**Supplementary Table 11.** Single-nucleotide polymorphisms used to build the genetic risk score for atrial fibrillation

**Supplementary Table 12.** Codes used in the UK Biobank study to identify atrial fibrillation cases

**Supplementary Table 13.** The numbers (percentages) of participants with missing covariates

**Supplementary Figure 1. Flowchart for the selection of the analyzed study sample from the UK Biobank Study**

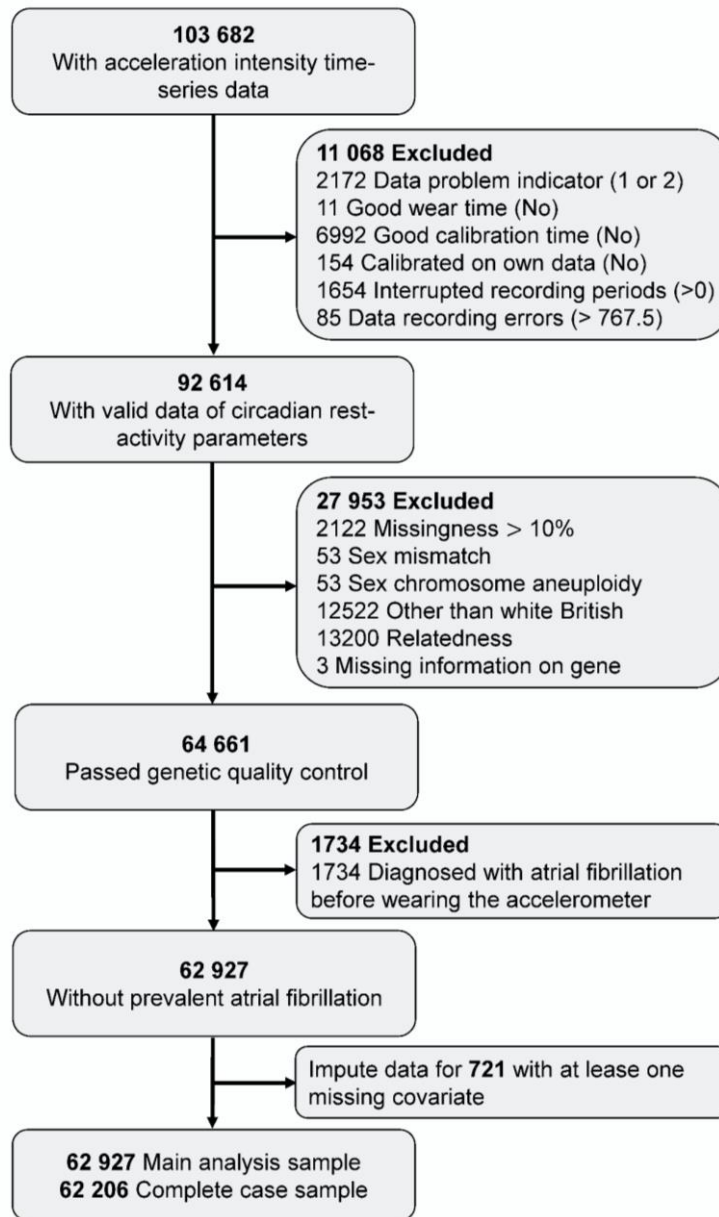

**Supplementary Figure 2. Acceleration level during seven-day monitoring with fitted curve for the circadian rest-activity characteristics among participants without and with incident atrial fibrillation**

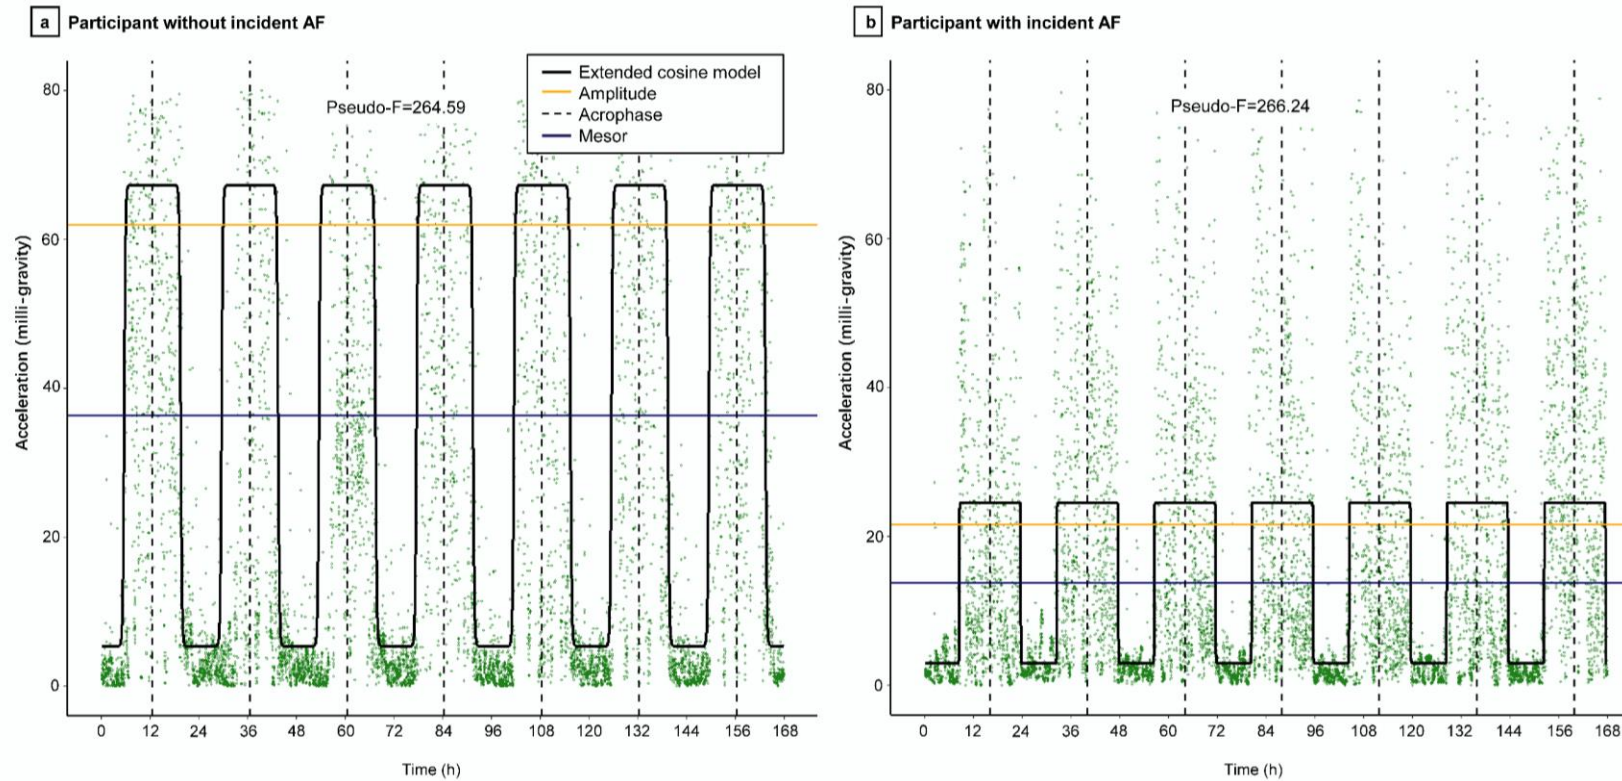

Abbreviation: AF, atrial fibrillation; Two participants, one without incident atrial fibrillation and the other one with incident atrial fibrillation, were selected from the study sample. a. The participant without incident atrial fibrillation had high amplitude and mesor as shown by the high overall level of activity and the high height of the fitted curve as well as advanced acrophase as shown by early peak activity of the fitted curve. b. The participant with incident atrial fibrillation had low amplitude and mesor as shown by the low overall level of activity and the dampened fitted curve as well as delayed acrophase as shown by late peak activity of the fitted curve.

**Supplementary Figure 3. Standardized risk of incident atrial fibrillation according to genetic risk and amplitude**

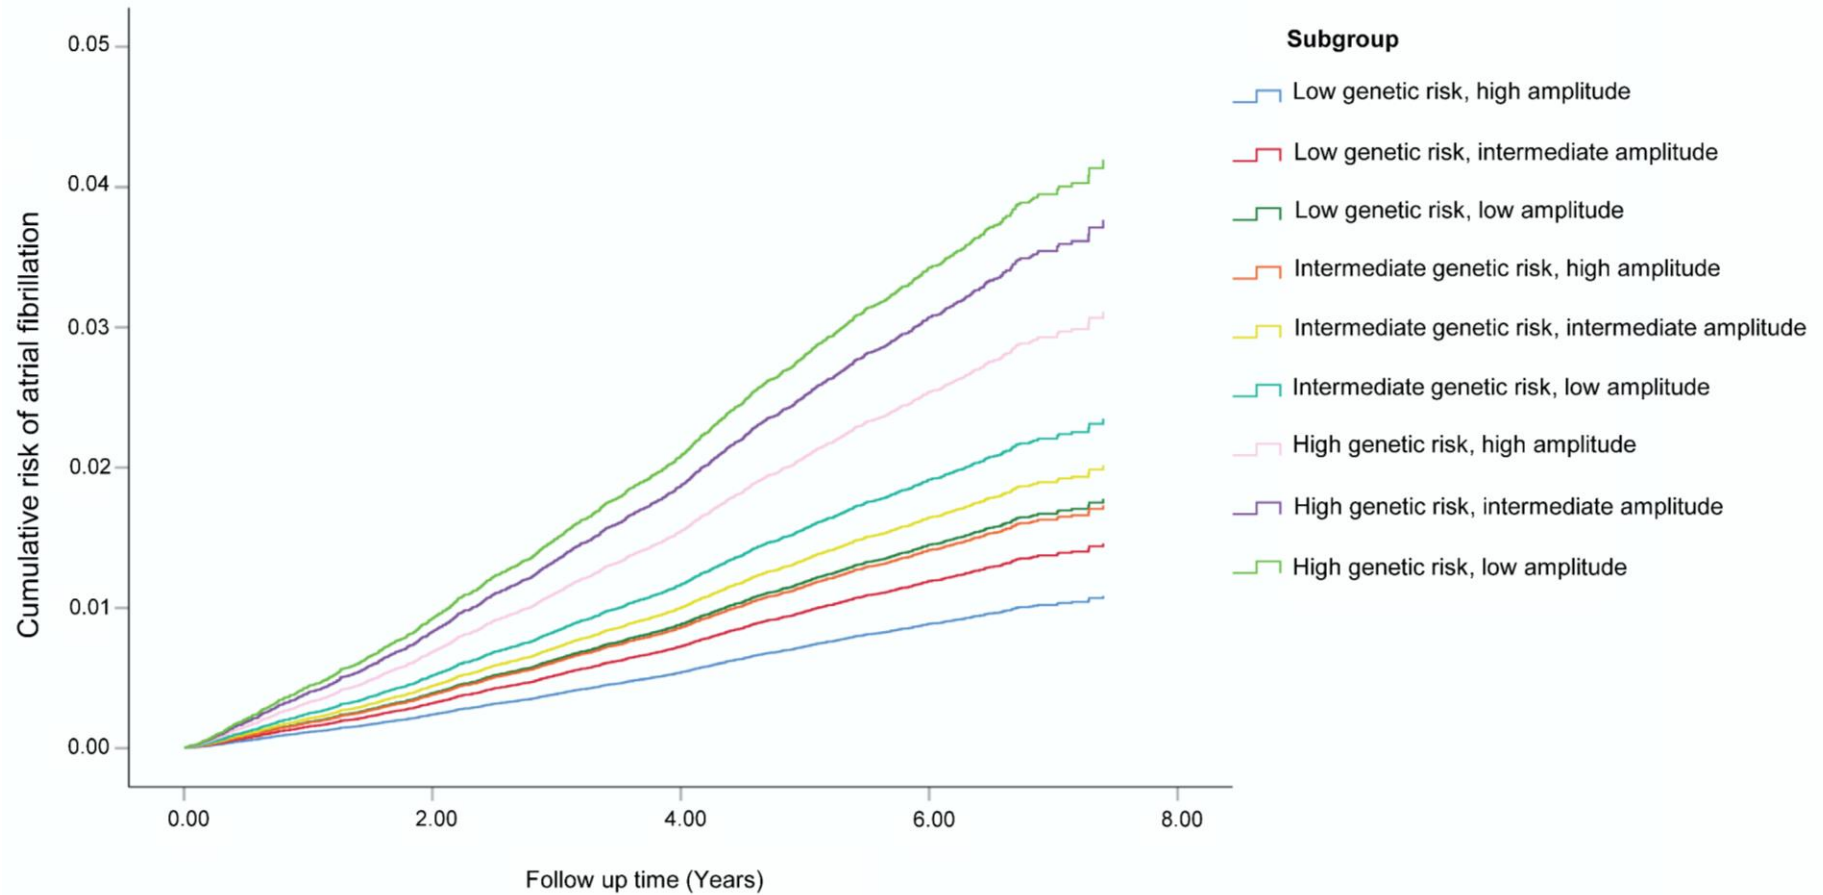

Abbreviation: AF, atrial fibrillation; BMI, body mass index. Cox proportional hazard models were adjusted for age, sex, Townsend deprivation index, recruitment centre, education level, season of accelerometer wear, BMI categories, healthy diet score, smoking status, alcohol intake, coffee consumption, tea consumption, hypertension, diabetes, dyslipidemia, sleep efficiency, sleep duration, genetic risk, and first 10 principal components of ancestry. Participants with prevalent AF were excluded.

**Supplementary Figure 4. Standardized risk of incident atrial fibrillation according to genetic risk and acrophase**

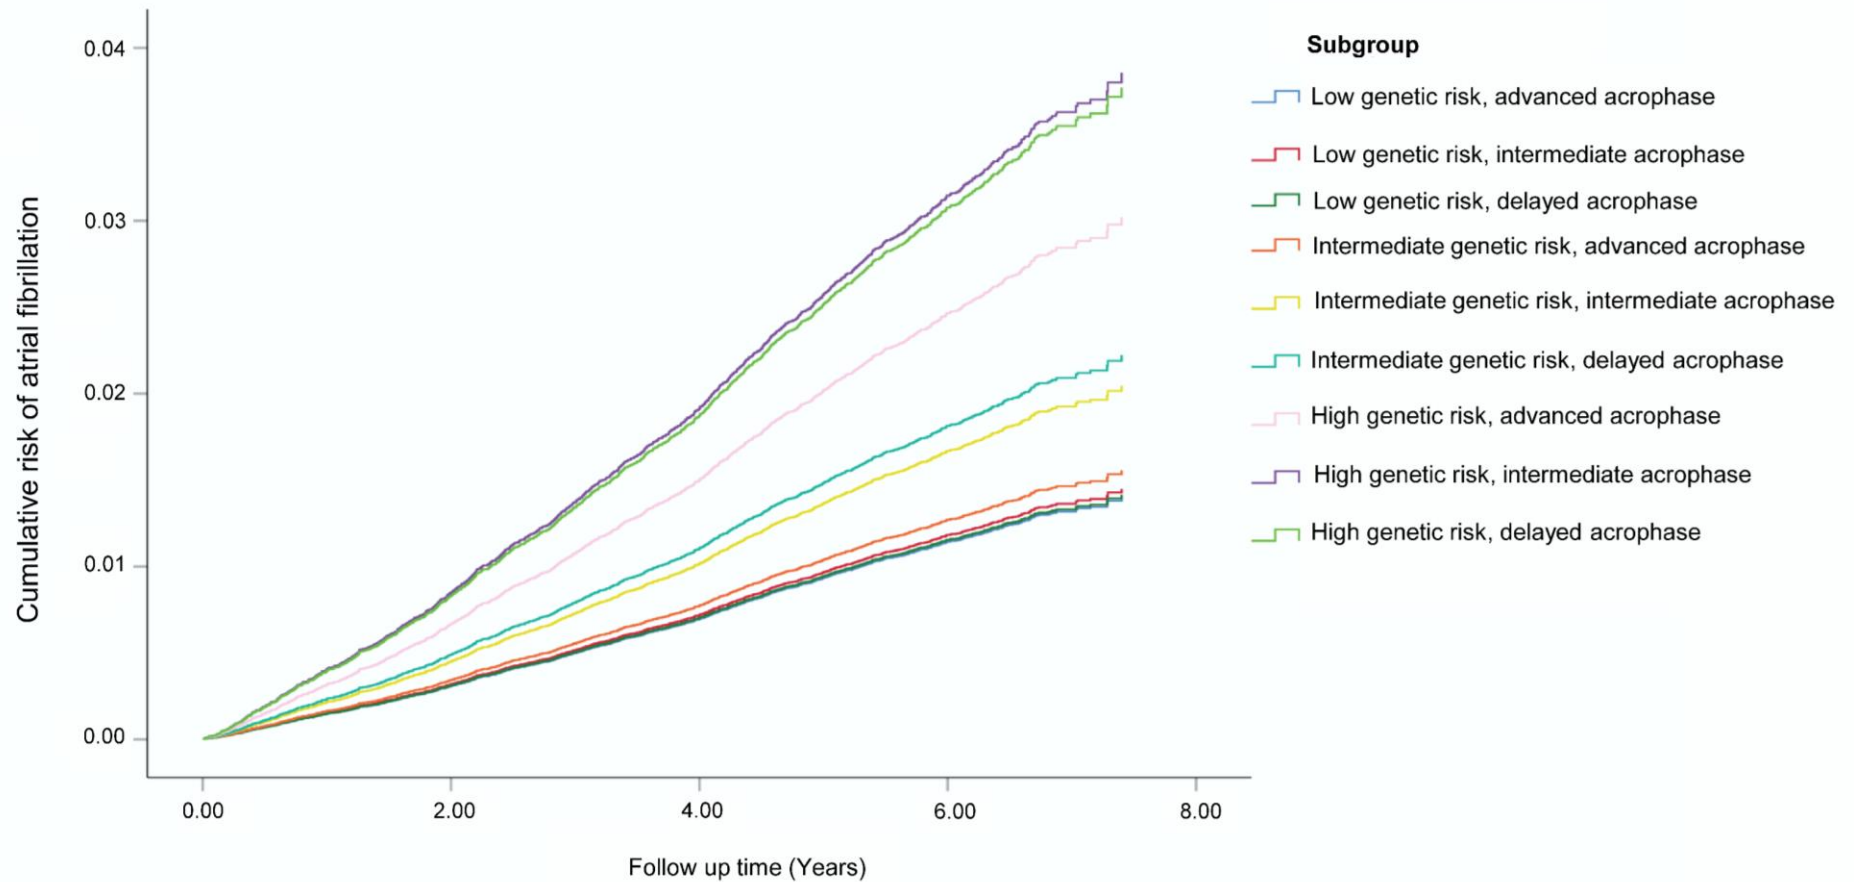

Abbreviation: AF, atrial fibrillation; BMI, body mass index. Cox proportional hazard models were adjusted for age, sex, Townsend deprivation index, recruitment centre, education level, season of accelerometer wear, BMI categories, healthy diet score, smoking status, alcohol intake, coffee consumption, tea consumption, hypertension, diabetes, dyslipidemia, sleep efficiency, sleep duration, genetic risk, and first 10 principal components of ancestry. Participants with prevalent AF were excluded.

**Supplementary Figure 5. Standardized risk of incident atrial fibrillation according to genetic risk and pseudo-F**

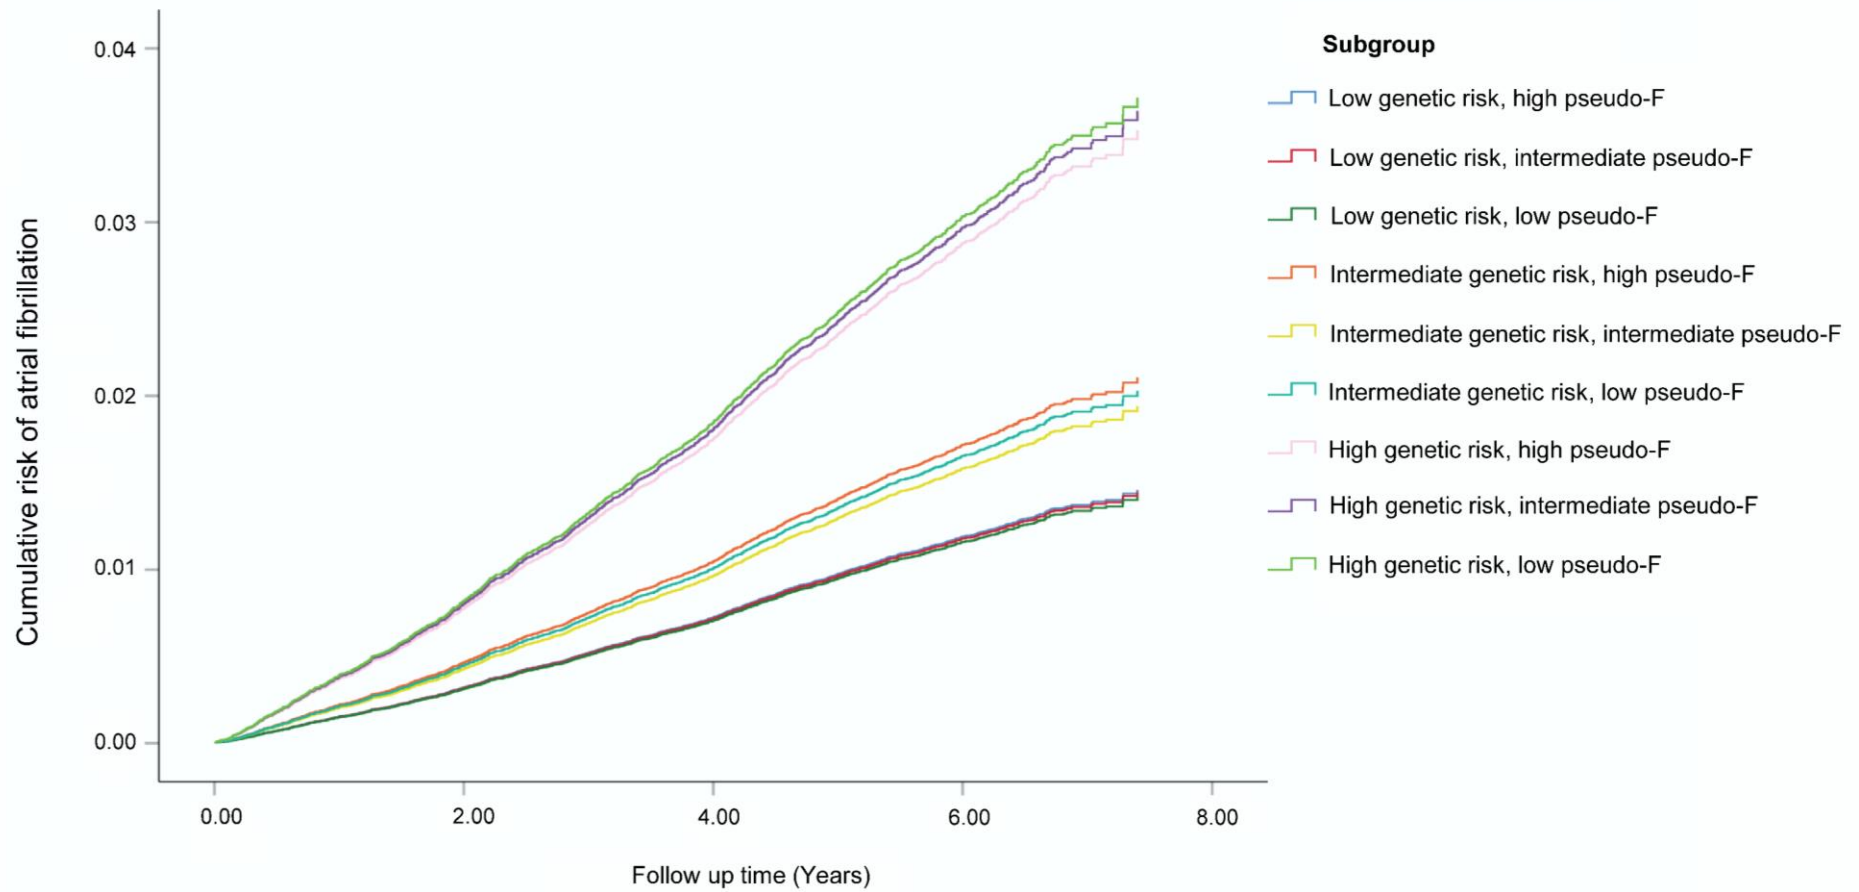

Abbreviation: AF, atrial fibrillation; BMI, body mass index. Cox proportional hazard models were adjusted for age, sex, Townsend deprivation index, recruitment centre, education level, season of accelerometer wear, BMI categories, healthy diet score, smoking status, alcohol intake, coffee consumption, tea consumption, hypertension, diabetes, dyslipidemia, sleep efficiency, sleep duration, genetic risk, and first 10 principal components of ancestry. Participants with prevalent AF were excluded.



**Supplementary Figure 6. Standardized risk of incident atrial fibrillation according to genetic risk and mesor**

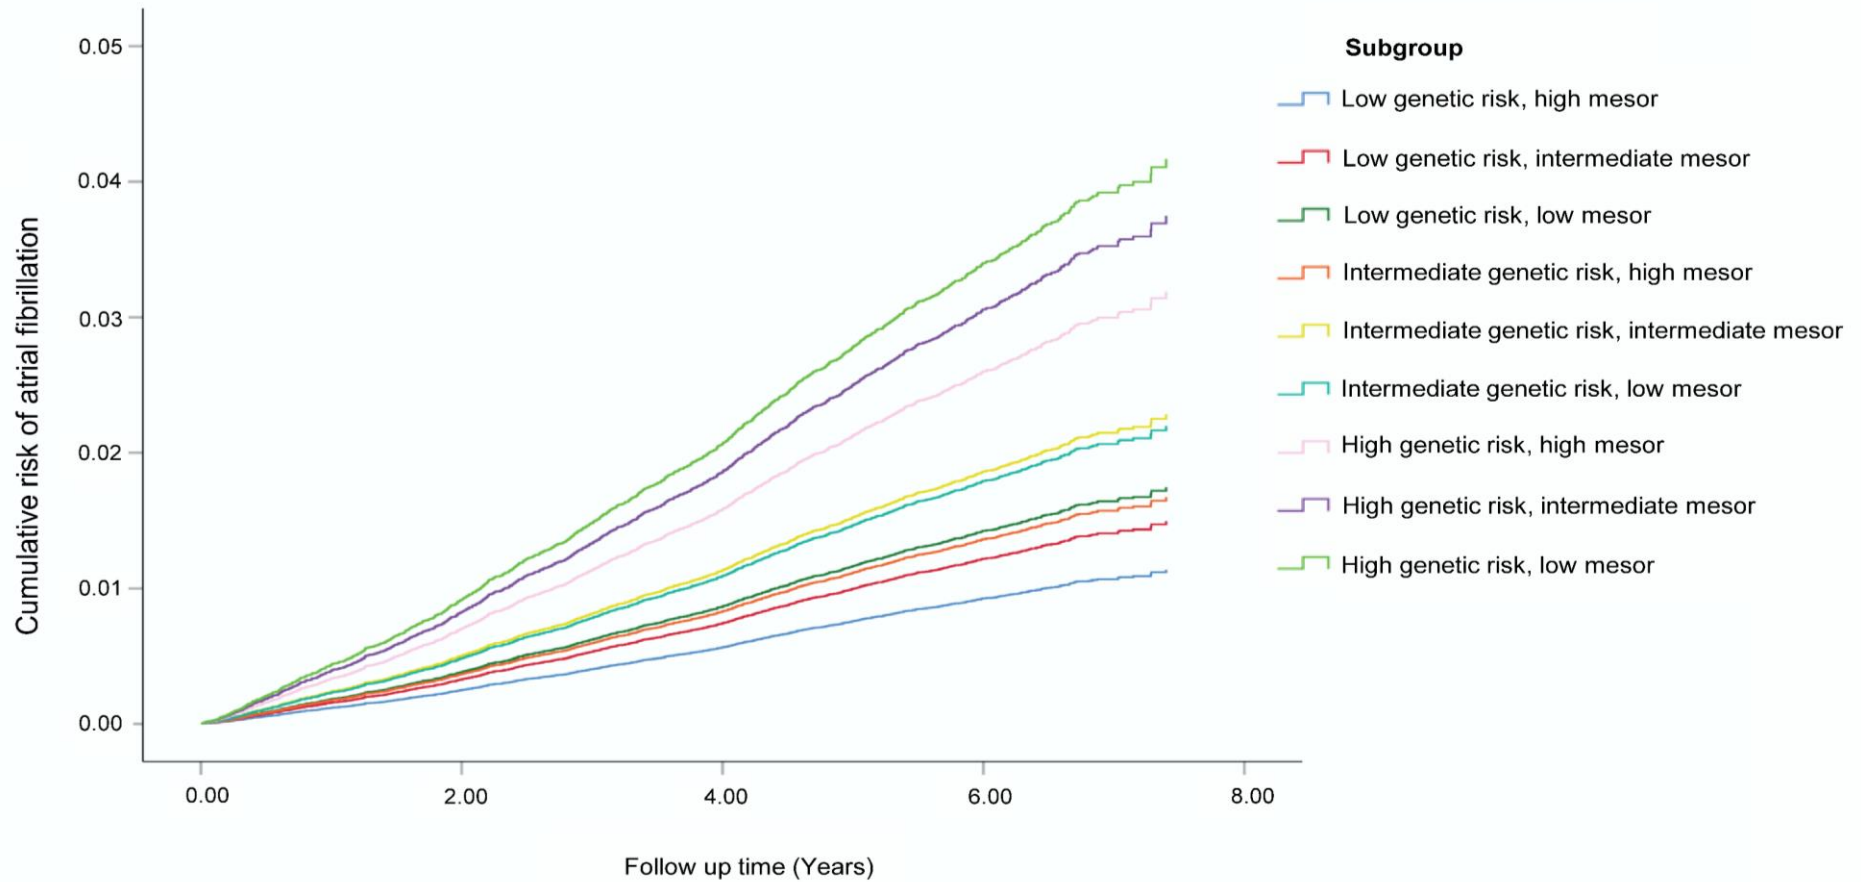

Abbreviation: AF, atrial fibrillation; BMI, body mass index. Cox proportional hazard models were adjusted for age, sex, Townsend deprivation index, recruitment centre, education level, season of accelerometer wear, BMI categories, healthy diet score, smoking status, alcohol intake, coffee consumption, tea consumption, hypertension, diabetes, dyslipidemia, sleep efficiency, sleep duration, genetic risk, and first 10 principal components of ancestry. Participants with prevalent AF were excluded.



**Supplementary Figure 7. Timeline of covariates collection**

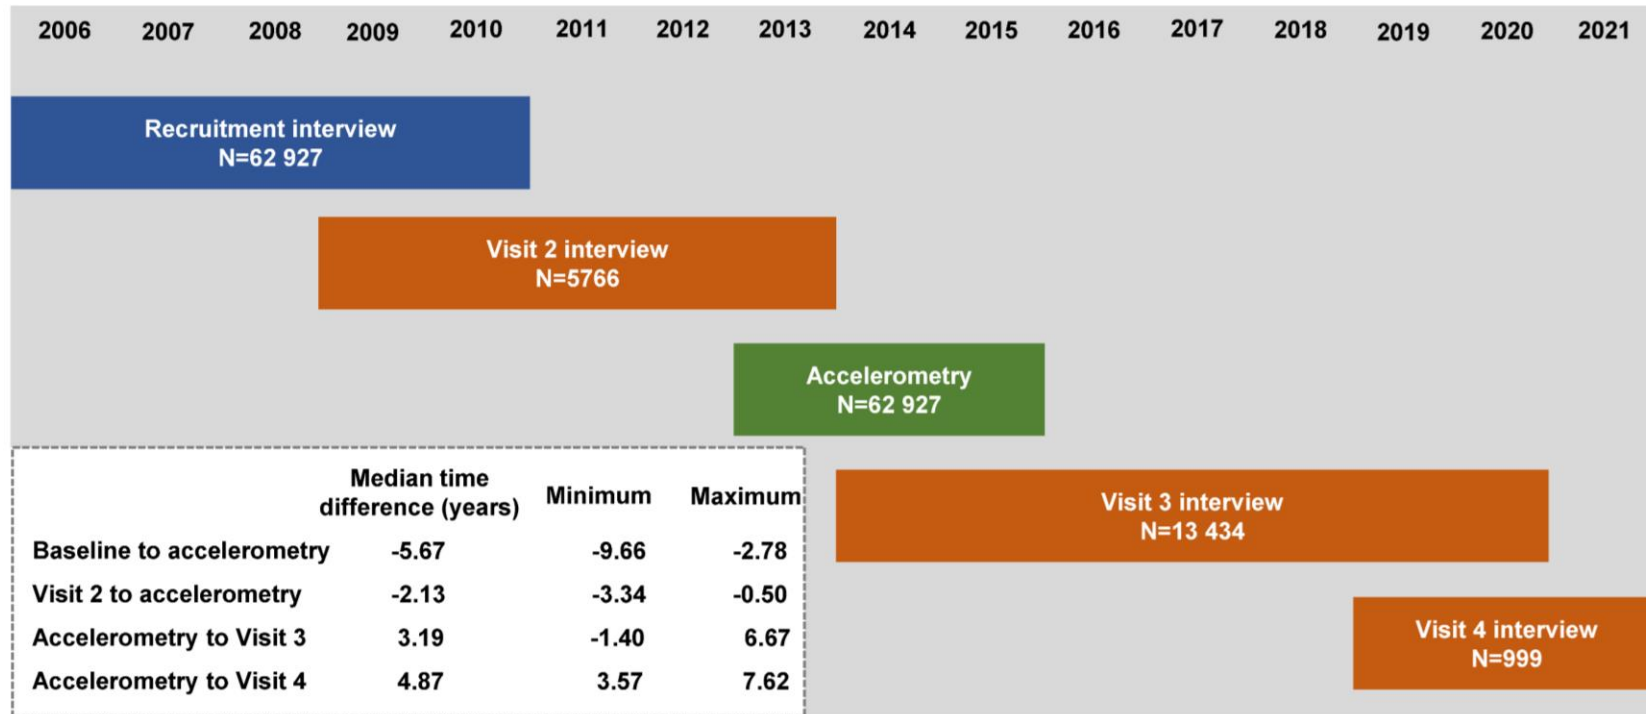

**Supplementary Figure 8. Associations between circadian rest-activity characteristics and incident atrial fibrillation**

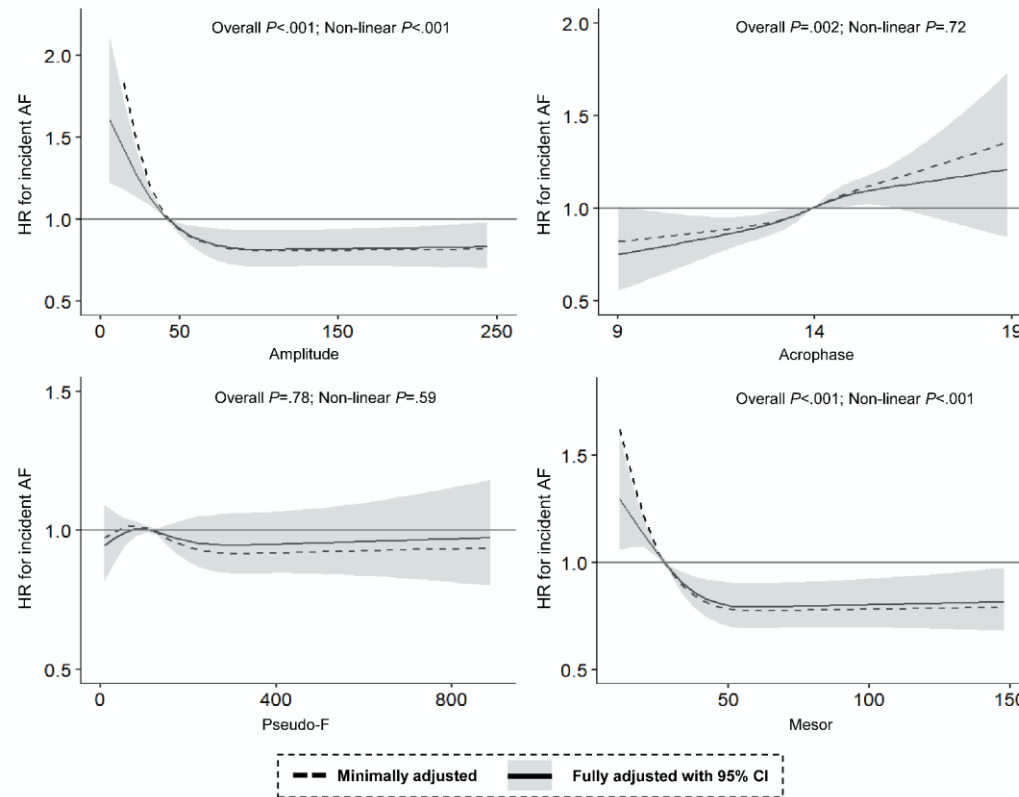

Abbreviation: AF, atrial fibrillation; BMI, body mass index; CI, confidence interval; HR, hazard ratio. In minimally adjusted models (Model 1, dash line), overall and non-linear testing analyses were adjusted for age and sex. In fully adjusted model (Model 4, solid line), overall and non-linear testing analyses were adjusted for age, sex, Townsend deprivation index, recruitment center, education level, season of accelerometer wear, BMI categories, healthy diet score, smoking status, alcohol intake, coffee consumption, tea consumption, hypertension, diabetes, dyslipidemia, sleep efficiency, and sleep duration, genetic risk, and first 10 principal components of ancestry. Shaded areas represent 95% confidence intervals (CIs). Participants with prevalent AF were excluded.

**Supplementary Table 1. Risk of Incident atrial fibrillation according to circadian rest-activity characteristics**

| <b>Circadian rest-activity characteristics</b> | <b>No. of AF cases/ person-years</b> | <b>Model 1<br/>HR (95% CI); <i>P</i></b> | <b>Model 2<br/>HR (95% CI); <i>P</i></b> | <b>Model 3<br/>HR (95% CI); <i>P</i></b> | <b>Model 4<br/>HR (95% CI); <i>P</i></b> |
|------------------------------------------------|--------------------------------------|------------------------------------------|------------------------------------------|------------------------------------------|------------------------------------------|
| <b>Amplitude</b>                               |                                      |                                          |                                          |                                          |                                          |
| High (N=21137)                                 | 466/ 128 994                         | 1[Reference]                             | 1[Reference]                             | 1[Reference]                             | 1[Reference]                             |
| Intermediate (N=22656)                         | 630/ 137 630                         | 1.24 (1.10, 1.40); <0.001                | 1.24 (1.10, 1.40); <0.001                | 1.21 (1.07, 1.36); 0.002                 | 1.22 (1.08, 1.38); 0.001 <sup>a</sup>    |
| Low (N=19134)                                  | 824/ 114 387                         | 1.58 (1.41, 1.78); <0.001                | 1.58 (1.41, 1.77); <0.001                | 1.40 (1.25, 1.58); <0.001                | 1.41 (1.25, 1.58); <0.001 <sup>a</sup>   |
| <i>P value for trend</i>                       |                                      | <i>P</i> <0.001                          | <i>P</i> <0.001                          | <i>P</i> <0.001                          | <i>P</i> <0.001                          |
| <b>Acrophase</b>                               |                                      |                                          |                                          |                                          |                                          |
| Advanced (N=12743)                             | 421/ 76 728                          | 1[Reference]                             | 1[Reference]                             | 1[Reference]                             | 1[Reference]                             |
| Intermediate (N=20026)                         | 635/ 121 026                         | 1.20 (1.06, 1.35); 0.005                 | 1.21 (1.07, 1.37); 0.003                 | 1.23 (1.08, 1.39); 0.001                 | 1.22 (1.08, 1.39); 0.001 <sup>a</sup>    |
| Delayed (N=30158)                              | 864/ 183 256                         | 1.23 (1.10, 1.39); <0.001                | 1.25 (1.11, 1.41); <0.001                | 1.24 (1.11, 1.40); <0.001                | 1.24 (1.10, 1.39); <0.001 <sup>a</sup>   |
| <i>P value for trend</i>                       |                                      | <i>P</i> <0.001                          | <i>P</i> <0.001                          | <i>P</i> <0.001                          | <i>P</i> =0.001                          |
| <b>Pseudo-F</b>                                |                                      |                                          |                                          |                                          |                                          |
| High (N=15007)                                 | 439/ 91 306                          | 1[Reference]                             | 1[Reference]                             | 1[Reference]                             | 1[Reference]                             |
| Intermediate (N=20884)                         | 645/ 126 353                         | 1.01 (0.89, 1.14); 0.89                  | 1.01 (0.90, 1.14); 0.87                  | 1.00 (0.88, 1.12); 0.94                  | 0.99 (0.88, 1.12); 0.85                  |
| Low (N=27036)                                  | 836/ 163 351                         | 1.06 (0.94, 1.18); 0.37                  | 1.05 (0.94, 1.18); 0.38                  | 1.02 (0.91, 1.15); 0.70                  | 1.01 (0.90, 1.13); 0.89                  |
| <i>P value for trend</i>                       |                                      | <i>P</i> =0.32                           | <i>P</i> =0.35                           | <i>P</i> =0.66                           | <i>P</i> =0.84                           |
| <b>Mesor</b>                                   |                                      |                                          |                                          |                                          |                                          |
| High (N=23755)                                 | 558/ 144 836                         | 1[Reference]                             | 1[Reference]                             | 1[Reference]                             | 1[Reference]                             |
| Intermediate (N=19756)                         | 601/ 119 818                         | 1.30 (1.16, 1.46); <0.001                | 1.30 (1.16, 1.46); <0.001                | 1.26 (1.12, 1.41); <0.001                | 1.26 (1.12, 1.41); <0.001 <sup>a</sup>   |
| Low (N=19416)                                  | 761/116 355                          | 1.52 (1.37, 1.70); <0.001                | 1.52 (1.36, 1.69); <0.001                | 1.35 (1.21, 1.51); <0.001                | 1.36 (1.21, 1.52); <0.001 <sup>a</sup>   |

*P value for trend*

*P<0.001*

*P<0.001*

*P<0.001*

*P<0.001*

---

Abbreviation: AF, atrial fibrillation; BMI, body mass index; CI, confidence interval; FDR, false-discovery rate; HR, hazard ratio.

Analyses were conducted using Cox proportional hazard models. **Model 1** was adjusted for age, sex, and first 10 principal components of ancestry. **Model 2** was adjusted as in model 1 and for Townsend deprivation index, recruitment centre, education level, and season of accelerometer wear. **Model 3** was adjusted as in model 2 and for BMI categories, healthy diet score, smoking status, alcohol intake, coffee consumption, tea consumption, hypertension, diabetes, and dyslipidemia. **Model 4** was adjusted as in model 3 and for sleep efficiency, sleep duration, and genetic risk. Participants with prevalent AF were excluded. <sup>a</sup> P values remained significant after multiple testing with FDR method.

**Supplementary Table 2. Risk of Incident atrial fibrillation according to circadian rest-activity characteristics stratified by age categories**

| <b>Circadian rest-activity characteristics</b> | <b>No. of AF cases/ person-years</b> | <b>Model 1<br/>HR (95% CI); <i>P</i></b> | <b>Model 2<br/>HR (95% CI); <i>P</i></b> | <b>Model 3<br/>HR (95% CI); <i>P</i></b> | <b>Model 4<br/>HR (95% CI); <i>P</i></b> |
|------------------------------------------------|--------------------------------------|------------------------------------------|------------------------------------------|------------------------------------------|------------------------------------------|
| <b>Age &lt; 65 years</b>                       |                                      |                                          |                                          |                                          |                                          |
| <b>Amplitude</b>                               |                                      |                                          |                                          |                                          |                                          |
| High (N=12 982)                                | 133/80 290                           | 1[Reference]                             | 1[Reference]                             | 1[Reference]                             | 1[Reference]                             |
| Intermediate (N=12 905)                        | 179/79 628                           | 1.43 (1.14, 1.79); 0.002                 | 1.43 (1.14, 1.79); 0.002                 | 1.38 (1.10, 1.73); 0.006                 | 1.39 (1.11, 1.75); 0.004 <sup>a</sup>    |
| Low (N=9316)                                   | 161/57 238                           | 1.61 (1.28, 2.03); <0.001                | 1.60 (1.27, 2.02); <0.001                | 1.40 (1.10, 1.77); 0.006                 | 1.40 (1.10, 1.77); 0.006 <sup>a</sup>    |
| <i>P value for trend</i>                       |                                      | <i>P</i> <0.001                          | <i>P</i> <0.001                          | <i>P</i> =0.005                          | <i>P</i> =0.006                          |
| <b>Acrophase</b>                               |                                      |                                          |                                          |                                          |                                          |
| Advanced (N=5763)                              | 68/35 469                            | 1[Reference]                             | 1[Reference]                             | 1[Reference]                             | 1[Reference]                             |
| Intermediate (N=10 823)                        | 162/66 660                           | 1.50 (1.13, 1.99); 0.005                 | 1.54 (1.16, 2.05); 0.003                 | 1.56 (1.17, 2.07); 0.002                 | 1.54 (1.16, 2.05); 0.003 <sup>a</sup>    |
| Delayed (N=18 617)                             | 243/115 027                          | 1.37 (1.04, 1.79); 0.02                  | 1.40 (1.06, 1.83); 0.02                  | 1.39 (1.06, 1.82); 0.02                  | 1.36 (1.04, 1.79); 0.03 <sup>a</sup>     |
| <i>P value for trend</i>                       |                                      | <i>P</i> =0.097                          | <i>P</i> =0.077                          | <i>P</i> =0.095                          | <i>P</i> =0.13                           |
| <b>Pseudo-F</b>                                |                                      |                                          |                                          |                                          |                                          |
| High (N=8349)                                  | 107/51 799                           | 1[Reference]                             | 1[Reference]                             | 1[Reference]                             | 1[Reference]                             |
| Intermediate (N=11 116)                        | 140/68 586                           | 0.93 (0.72, 1.19); 0.56                  | 0.94 (0.73, 1.20); 0.61                  | 0.92 (0.72, 1.19); 0.52                  | 0.93 (0.72, 1.19); 0.55                  |
| Low (N=15 738)                                 | 226/96 772                           | 1.00 (0.80, 1.27); 0.97                  | 1.01 (0.80, 1.27); 0.96                  | 0.97 (0.77, 1.22); 0.78                  | 0.97 (0.77, 1.22); 0.79                  |
| <i>P value for trend</i>                       |                                      | <i>P</i> =0.85                           | <i>P</i> =0.84                           | <i>P</i> =0.89                           | <i>P</i> =0.89                           |
| <b>Mesor</b>                                   |                                      |                                          |                                          |                                          |                                          |
| High (N=13 826)                                | 147/85 514                           | 1[Reference]                             | 1[Reference]                             | 1[Reference]                             | 1[Reference]                             |
| Intermediate (N=11 063)                        | 155/68 283                           | 1.38 (1.10, 1.73); 0.005                 | 1.38 (1.10, 1.73); 0.005                 | 1.31 (1.05, 1.65); 0.019                 | 1.32 (1.05, 1.66); 0.017 <sup>a</sup>    |

|                          |            |                           |                           |                           |                                        |
|--------------------------|------------|---------------------------|---------------------------|---------------------------|----------------------------------------|
| Low (N=10 314)           | 171/63 359 | 1.58 (1.27, 1.97); <0.001 | 1.57 (1.25, 1.95); <0.001 | 1.38 (1.10, 1.73); 0.006  | 1.39 (1.11, 1.75); 0.004 <sup>a</sup>  |
| <i>P value for trend</i> |            | <i>P&lt;0.001</i>         | <i>P&lt;0.001</i>         | <i>P=0.006</i>            | <i>P=0.004</i>                         |
| <b>Age ≥ 65 years</b>    |            |                           |                           |                           |                                        |
| <b>Amplitude</b>         |            |                           |                           |                           |                                        |
| High (N=8155)            | 333/48704  | 1[Reference]              | 1[Reference]              | 1[Reference]              | 1[Reference]                           |
| Intermediate (N=9751)    | 451/58002  | 1.17 (1.02, 1.35); 0.027  | 1.17 (1.02, 1.35); 0.028  | 1.15 (0.99, 1.32); 0.06   | 1.16 (1.01, 1.34); 0.04                |
| Low (N=9818)             | 663/57149  | 1.56 (1.37, 1.78); <0.001 | 1.56 (1.36, 1.78); <0.001 | 1.39 (1.22, 1.59); <0.001 | 1.40 (1.22, 1.60); <0.001 <sup>a</sup> |
| <i>P value for trend</i> |            | <i>P&lt;0.001</i>         | <i>P&lt;0.001</i>         | <i>P&lt;0.001</i>         | <i>P&lt;0.001</i>                      |
| <b>Acrophase</b>         |            |                           |                           |                           |                                        |
| Advanced (N=6980)        | 353/41259  | 1[Reference]              | 1[Reference]              | 1[Reference]              | 1[Reference]                           |
| Intermediate (N=9203)    | 473/54366  | 1.13 (0.98, 1.29); 0.097  | 1.13 (0.99, 1.30); 0.077  | 1.15 (1.00, 1.32); 0.051  | 1.15 (1.00, 1.32); 0.051               |
| Delayed (N=11541)        | 621/68229  | 1.21 (1.06, 1.38); 0.005  | 1.22 (1.07, 1.40); 0.003  | 1.22 (1.07, 1.39); 0.004  | 1.22 (1.06, 1.39); 0.004 <sup>a</sup>  |
| <i>P value for trend</i> |            | <i>P=0.005</i>            | <i>P=0.003</i>            | <i>P=0.004</i>            | <i>P=0.005</i>                         |
| <b>Pseudo-F</b>          |            |                           |                           |                           |                                        |
| High (N=6658)            | 332/39507  | 1[Reference]              | 1[Reference]              | 1[Reference]              | 1[Reference]                           |
| Intermediate (N=9768)    | 505/57767  | 1.04 (0.90, 1.19); 0.61   | 1.04 (0.90, 1.19); 0.62   | 1.02 (0.89, 1.17); 0.76   | 1.01 (0.88, 1.16); 0.86                |
| Low (N=11298)            | 610/66580  | 1.08 (0.94, 1.23); 0.29   | 1.07 (0.94, 1.23); 0.32   | 1.04 (0.91, 1.19); 0.53   | 1.02 (0.89, 1.17); 0.74                |
| <i>P value for trend</i> |            | <i>P=0.29</i>             | <i>P=0.31</i>             | <i>P=0.53</i>             | <i>P=0.74</i>                          |
| <b>Mesor</b>             |            |                           |                           |                           |                                        |
| High (N=9929)            | 411/59322  | 1[Reference]              | 1[Reference]              | 1[Reference]              | 1[Reference]                           |
| Intermediate (N=8693)    | 446/51536  | 1.27 (1.11, 1.46); <0.001 | 1.28 (1.12, 1.46); <0.001 | 1.23 (1.08, 1.41); 0.002  | 1.24 (1.08, 1.42); 0.002 <sup>a</sup>  |
| Low (N=9102)             | 590/52996  | 1.50 (1.32, 1.71); <0.001 | 1.50 (1.32, 1.70); <0.001 | 1.34 (1.17, 1.52); <0.001 | 1.34 (1.18, 1.53); <0.001 <sup>a</sup> |
| <i>P value for trend</i> |            | <i>P&lt;0.001</i>         | <i>P&lt;0.001</i>         | <i>P&lt;0.001</i>         | <i>P&lt;0.001</i>                      |

Abbreviation: AF, atrial fibrillation; BMI, body mass index; CI, confidence interval; FDR, false-discovery rate; HR, hazard ratio.

Analyses were conducted using Cox proportional hazard models. **Model 1** was adjusted for age, sex, and first 10 principal components of ancestry. **Model 2** was adjusted as in model 1 and for Townsend deprivation

index, recruitment centre, education level, and season of accelerometer wear. **Model 3** was adjusted as in model 2 and for BMI categories, healthy diet score, smoking status, alcohol intake, coffee consumption, tea consumption, hypertension, diabetes, and dyslipidemia. **Model 4** was adjusted as in model 3 and for sleep efficiency, sleep duration, and genetic risk. Participants with prevalent AF were excluded. <sup>a</sup> P values remained significant after multiple testing with FDR method.



**Supplementary Table 3. Risk of Incident atrial fibrillation according to circadian rest-activity characteristics stratified by sex categories**

| <b>Circadian rest-activity characteristics</b> | <b>No. of AF cases/ person-years</b> | <b>Model 1<br/>HR (95% CI); <i>P</i></b> | <b>Model 2<br/>HR (95% CI); <i>P</i></b> | <b>Model 3<br/>HR (95% CI); <i>P</i></b> | <b>Model 4<br/>HR (95% CI); <i>P</i></b> |
|------------------------------------------------|--------------------------------------|------------------------------------------|------------------------------------------|------------------------------------------|------------------------------------------|
| <b>Females</b>                                 |                                      |                                          |                                          |                                          |                                          |
| Amplitude                                      |                                      |                                          |                                          |                                          |                                          |
| High (N=11281)                                 | 138/69281                            | 1[Reference]                             | 1[Reference]                             | 1[Reference]                             | 1[Reference]                             |
| Intermediate (N=13982)                         | 276/85482                            | 1.41 (1.15, 1.73); 0.001                 | 1.41 (1.15, 1.73); 0.001                 | 1.38 (1.13, 1.70); 0.002                 | 1.39 (1.13, 1.70); 0.002 <sup>a</sup>    |
| Low (N=10060)                                  | 315/60829                            | 1.92 (1.57, 2.35); <0.001                | 1.91 (1.56, 2.34); <0.001                | 1.69 (1.37, 2.08); <0.001                | 1.70 (1.38, 2.09); <0.001 <sup>a</sup>   |
| <i>P value for trend</i>                       |                                      | <i>P</i> <0.001                          | <i>P</i> <0.001                          | <i>P</i> <0.001                          | <i>P</i> <0.001                          |
| Acrophase                                      |                                      |                                          |                                          |                                          |                                          |
| Advanced (N=5926)                              | 121/36029                            | 1[Reference]                             | 1[Reference]                             | 1[Reference]                             | 1[Reference]                             |
| Intermediate (N=11721)                         | 245/71476                            | 1.14 (0.91, 1.41); 0.25                  | 1.15 (0.92, 1.43); 0.21                  | 1.18 (0.95, 1.47); 0.14                  | 1.19 (0.95, 1.48); 0.13                  |
| Delayed (N=17676)                              | 363/108088                           | 1.28 (1.04, 1.58); 0.02                  | 1.28 (1.04, 1.58); 0.02                  | 1.29 (1.05, 1.59); 0.02                  | 1.29 (1.04, 1.58); 0.02 <sup>a</sup>     |
| <i>P value for trend</i>                       |                                      | <i>P</i> =0.013                          | <i>P</i> =0.015                          | <i>P</i> =0.017                          | <i>P</i> =0.021                          |
| Pseudo-F                                       |                                      |                                          |                                          |                                          |                                          |
| High (N=9112)                                  | 184/55827                            | 1[Reference]                             | 1[Reference]                             | 1[Reference]                             | 1[Reference]                             |
| Intermediate (N=12187)                         | 256/74271                            | 1.02 (0.85, 1.23); 0.83                  | 1.03 (0.85, 1.24); 0.80                  | 1.01 (0.84, 1.22); 0.93                  | 1.02 (0.84, 1.24); 0.83                  |
| Low (N=14024)                                  | 289/85494                            | 1.10 (0.91, 1.32); 0.32                  | 1.09 (0.91, 1.31); 0.35                  | 1.05 (0.87, 1.26); 0.62                  | 1.05 (0.87, 1.27); 0.59                  |
| <i>P value for trend</i>                       |                                      | <i>P</i> =0.29                           | <i>P</i> =0.34                           | <i>P</i> =0.60                           | <i>P</i> =0.58                           |
| Mesor                                          |                                      |                                          |                                          |                                          |                                          |
| High (N=12815)                                 | 181/78593                            | 1[Reference]                             | 1[Reference]                             | 1[Reference]                             | 1[Reference]                             |
| Intermediate (N=11972)                         | 255/73133                            | 1.39 (1.14, 1.68); <0.001                | 1.38 (1.14, 1.67); <0.001                | 1.34 (1.11, 1.63); 0.003                 | 1.35 (1.12, 1.64); 0.002 <sup>a</sup>    |

|                          |           |                           |                           |                           |                                        |
|--------------------------|-----------|---------------------------|---------------------------|---------------------------|----------------------------------------|
| Low (N=10536)            | 293/63867 | 1.70 (1.41, 2.05); <0.001 | 1.68 (1.40, 2.03); <0.001 | 1.49 (1.23, 1.81); <0.001 | 1.51 (1.25, 1.83); <0.001 <sup>a</sup> |
| <i>P value for trend</i> |           | <i>P&lt;0.001</i>         | <i>P&lt;0.001</i>         | <i>P&lt;0.001</i>         | <i>P&lt;0.001</i>                      |
| <b>Males</b>             |           |                           |                           |                           |                                        |
| Amplitude                |           |                           |                           |                           |                                        |
| High (N=9856)            | 328/59713 | 1[Reference]              | 1[Reference]              | 1[Reference]              | 1[Reference]                           |
| Intermediate (N=8674)    | 354/52147 | 1.17 (1.01, 1.36); 0.041  | 1.17 (1.01, 1.36); 0.041  | 1.14 (0.98, 1.32); 0.093  | 1.16 (0.99, 1.34); 0.06                |
| Low (N=9074)             | 509/53557 | 1.44 (1.25, 1.65); <0.001 | 1.43 (1.25, 1.65); <0.001 | 1.28 (1.11, 1.48); <0.001 | 1.29 (1.11, 1.48); <0.001 <sup>a</sup> |
| <i>P value for trend</i> |           | <i>P&lt;0.001</i>         | <i>P&lt;0.001</i>         | <i>P&lt;0.001</i>         | <i>P&lt;0.001</i>                      |
| Acrophase                |           |                           |                           |                           |                                        |
| Advanced (N=6817)        | 300/40699 | 1[Reference]              | 1[Reference]              | 1[Reference]              | 1[Reference]                           |
| Intermediate (N=8305)    | 390/49550 | 1.23 (1.06, 1.43); 0.008  | 1.25 (1.07, 1.45); 0.004  | 1.26 (1.08, 1.47); 0.003  | 1.25 (1.08, 1.46); 0.003 <sup>a</sup>  |
| Delayed (N=12482)        | 501/75168 | 1.19 (1.03, 1.38); 0.018  | 1.22 (1.05, 1.41); 0.008  | 1.21 (1.05, 1.40); 0.010  | 1.20 (1.04, 1.39); 0.014 <sup>a</sup>  |
| <i>P value for trend</i> |           | <i>P=0.03</i>             | <i>P=0.01</i>             | <i>P=0.02</i>             | <i>P=0.03</i>                          |
| Pseudo-F                 |           |                           |                           |                           |                                        |
| High (N=5895)            | 255/35478 | 1[Reference]              | 1[Reference]              | 1[Reference]              | 1[Reference]                           |
| Intermediate (N=8697)    | 389/52081 | 1.00 (0.86, 1.17); 0.98   | 1.00 (0.86, 1.18); 0.97   | 0.99 (0.84, 1.16); 0.87   | 0.97 (0.83, 1.14); 0.71                |
| Low (N=13012)            | 547/77857 | 1.03 (0.88, 1.19); 0.74   | 1.03 (0.89, 1.19); 0.72   | 1.00 (0.86, 1.16); 0.98   | 0.98 (0.84, 1.14); 0.77                |
| <i>P value for trend</i> |           | <i>P=0.71</i>             | <i>P=0.69</i>             | <i>P=0.94</i>             | <i>P=0.81</i>                          |
| Mesor                    |           |                           |                           |                           |                                        |
| High (N=10940)           | 377/66243 | 1[Reference]              | 1[Reference]              | 1[Reference]              | 1[Reference]                           |
| Intermediate (N=7784)    | 346/46685 | 1.27 (1.09, 1.46); 0.002  | 1.27 (1.10, 1.47); 0.001  | 1.22 (1.05, 1.41); 0.009  | 1.21 (1.05, 1.41); 0.01 <sup>a</sup>   |
| Low (N=8880)             | 468/52488 | 1.43 (1.25, 1.64); <0.001 | 1.43 (1.25, 1.64); <0.001 | 1.28 (1.11, 1.47); <0.001 | 1.28 (1.11, 1.47); <0.001 <sup>a</sup> |
| <i>P value for trend</i> |           | <i>P&lt;0.001</i>         | <i>P&lt;0.001</i>         | <i>P&lt;0.001</i>         | <i>P&lt;0.001</i>                      |

Abbreviation: AF, atrial fibrillation; BMI, body mass index; CI, confidence interval; FDR, false-discovery rate; HR, hazard ratio.

Analyses were conducted using Cox proportional hazard models. **Model 1** was adjusted for age, sex, and first 10 principal components of ancestry. **Model 2** was adjusted as in model 1 and for Townsend deprivation

index, recruitment centre, education level, and season of accelerometer wear. **Model 3** was adjusted as in model 2 and for BMI categories, healthy diet score, smoking status, alcohol intake, coffee consumption, tea consumption, hypertension, diabetes, and dyslipidemia. **Model 4** was adjusted as in model 3 and for sleep efficiency, sleep duration, and genetic risk. Participants with prevalent AF were excluded. <sup>a</sup> P values remained significant after multiple testing with FDR method.

**Supplementary Table 4. Risk of Incident atrial fibrillation according to genetic and circadian rest-activity characteristics**

| <b>Subgroup</b>                  | <b>No. of AF cases/<br/>person-years</b> | <b>Model 1</b><br>HR (95% CI); <i>P</i> | <b>Model 2</b><br>HR (95% CI); <i>P</i> | <b>Model 3</b><br>HR (95% CI); <i>P</i> | <b>Model 4</b><br>HR (95% CI); <i>P</i> |
|----------------------------------|------------------------------------------|-----------------------------------------|-----------------------------------------|-----------------------------------------|-----------------------------------------|
| <b>Amplitude</b>                 |                                          |                                         |                                         |                                         |                                         |
| <b>Low genetic risk</b>          |                                          |                                         |                                         |                                         |                                         |
| High (N=7121)                    | 89/43 571                                | 1[Reference]                            | 1[Reference]                            | 1[Reference]                            | 1[Reference]                            |
| Intermediate (N=7673)            | 134/46 802                               | 1.38 (1.06, 1.81); 0.02                 | 1.38 (1.06, 1.81); 0.02                 | 1.35 (1.03, 1.76); 0.03                 | 1.34 (1.03, 1.76); 0.03 <sup>a</sup>    |
| Low (N=6480)                     | 187/38 993                               | 1.85 (1.43, 2.38); <0.001               | 1.84 (1.43, 2.37); <0.001               | 1.65 (1.28, 2.13); <0.001               | 1.64 (1.27, 2.11); <0.001 <sup>a</sup>  |
| <b>Intermediate genetic risk</b> |                                          |                                         |                                         |                                         |                                         |
| High (N=6976)                    | 134/42 643                               | 1.58 (1.21, 2.06); <0.001               | 1.58 (1.21, 2.07); <0.001               | 1.60 (1.22, 2.09); <0.001               | 1.59 (1.22, 2.08); <0.001 <sup>a</sup>  |
| Intermediate (N=7667)            | 183/46 750                               | 1.90 (1.47, 2.44); <0.001               | 1.90 (1.47, 2.45); <0.001               | 1.85 (1.44, 2.39); <0.001               | 1.86 (1.44, 2.39); <0.001 <sup>a</sup>  |
| Low (N=6448)                     | 244/38 578                               | 2.49 (1.95, 3.17); <0.001               | 2.47 (1.94, 3.15); <0.001               | 2.18 (1.71, 2.78); <0.001               | 2.16 (1.69, 2.76); <0.001 <sup>a</sup>  |
| <b>High genetic risk</b>         |                                          |                                         |                                         |                                         |                                         |
| High (N=7040)                    | 243/42 780                               | 2.85 (2.24, 3.64); <0.001               | 2.85 (2.24, 3.64); <0.001               | 2.87 (2.25, 3.65); <0.001               | 2.87 (2.25, 3.66); <0.001 <sup>a</sup>  |
| Intermediate (N=7316)            | 313/44 078                               | 3.54 (2.80, 4.48); <0.001               | 3.54 (2.80, 4.48); <0.001               | 3.47 (2.74, 4.40); <0.001               | 3.47 (2.74, 4.39); <0.001 <sup>a</sup>  |
| Low (N=6206)                     | 393/36 816                               | 4.35 (3.46, 5.48); <0.001               | 4.35 (3.46, 5.48); <0.001               | 3.90 (3.09, 4.92); <0.001               | 3.87 (3.07, 4.87); <0.001 <sup>a</sup>  |
| <i>P value for trend</i>         |                                          | <i>P</i> <0.001                         | <i>P</i> <0.001                         | <i>P</i> <0.001                         | <i>P</i> <0.001                         |
| <b>Acrophase</b>                 |                                          |                                         |                                         |                                         |                                         |
| <b>Low genetic risk</b>          |                                          |                                         |                                         |                                         |                                         |
| Advanced (N=4386)                | 109/26 489                               | 1[Reference]                            | 1[Reference]                            | 1[Reference]                            | 1[Reference]                            |
| Intermediate (N=6830)            | 133/41 374                               | 0.99 (0.77, 1.28); 0.96                 | 1.01 (0.78, 1.30); 0.94                 | 1.03 (0.80, 1.33); 0.83                 | 1.03 (0.80, 1.33); 0.80                 |
| Delayed (N=10 058)               | 168/61 503                               | 0.98 (0.77, 1.25); 0.86                 | 1.00 (0.78, 1.27); 0.99                 | 1.00 (0.79, 1.28); 0.98                 | 1.01 (0.79, 1.29); 0.94                 |
| <b>Intermediate genetic risk</b> |                                          |                                         |                                         |                                         |                                         |

|                                  |            |                           |                           |                           |                                        |
|----------------------------------|------------|---------------------------|---------------------------|---------------------------|----------------------------------------|
| Advanced (N=4291)                | 113/25 949 | 1.10 (0.85, 1.44); 0.46   | 1.11 (0.85, 1.44); 0.44   | 1.11 (0.86, 1.45); 0.42   | 1.11 (0.85, 1.45); 0.43                |
| Intermediate (N=6613)            | 180/40 071 | 1.40 (1.11, 1.78); 0.005  | 1.43 (1.13, 1.81); 0.003  | 1.45 (1.14, 1.84); 0.002  | 1.46 (1.15, 1.85); 0.002 <sup>a</sup>  |
| Delayed (N=10 187)               | 268/61 950 | 1.56 (1.24, 1.94); <0.001 | 1.58 (1.26, 1.97); <0.001 | 1.57 (1.26, 1.97); <0.001 | 1.59 (1.27, 1.99); <0.001 <sup>a</sup> |
| <b>High genetic risk</b>         |            |                           |                           |                           |                                        |
| Advanced (N=4066)                | 199/24 289 | 2.11 (1.67, 2.67); <0.001 | 2.13 (1.69, 2.69); <0.001 | 2.16 (1.71, 2.73); <0.001 | 2.16 (1.71, 2.73); <0.001 <sup>a</sup> |
| Intermediate (N=6583)            | 322/39 582 | 2.63 (2.11, 3.27); <0.001 | 2.67 (2.15, 3.32); <0.001 | 2.74 (2.20, 3.40); <0.001 | 2.75 (2.21, 3.43); <0.001 <sup>a</sup> |
| Delayed (N=9913)                 | 428/59 802 | 2.62 (2.12, 3.24); <0.001 | 2.66 (2.15, 3.29); <0.001 | 2.68 (2.17, 3.31); <0.001 | 2.69 (2.18, 3.33); <0.001 <sup>a</sup> |
| <i>P value for trend</i>         |            | <i>P &lt;0.001</i>        | <i>P &lt;0.001</i>        | <i>P &lt;0.001</i>        | <i>P &lt;0.001</i>                     |
| <b>Pseudo-F</b>                  |            |                           |                           |                           |                                        |
| <b>Low genetic risk</b>          |            |                           |                           |                           |                                        |
| High (N=5026)                    | 96/30 676  | 1[Reference]              | 1[Reference]              | 1[Reference]              | 1[Reference]                           |
| Intermediate (N=7092)            | 141/43 111 | 1.00 (0.77, 1.29); 0.97   | 0.99 (0.77, 1.29); 0.96   | 0.99 (0.76, 1.28); 0.94   | 0.99 (0.76, 1.28); 0.94                |
| Low (N=9156)                     | 173/55 579 | 1.00 (0.78, 1.28); 0.98   | 1.00 (0.78, 1.28); >0.99  | 0.98 (0.76, 1.26); 0.87   | 0.97 (0.76, 1.25); 0.84                |
| <b>Intermediate genetic risk</b> |            |                           |                           |                           |                                        |
| High (N=5082)                    | 136/30 905 | 1.43 (1.10, 1.85); 0.008  | 1.43 (1.10, 1.86); 0.007  | 1.44 (1.11, 1.87); 0.006  | 1.44 (1.11, 1.88); 0.006 <sup>a</sup>  |
| Intermediate (N=6959)            | 181/42 269 | 1.34 (1.05, 1.72); 0.02   | 1.34 (1.05, 1.72); 0.02   | 1.33 (1.04, 1.70); 0.02   | 1.33 (1.04, 1.70); 0.02 <sup>a</sup>   |
| Low (N=9050)                     | 244/54 797 | 1.44 (1.14, 1.82); 0.003  | 1.43 (1.13, 1.82); 0.003  | 1.40 (1.10, 1.77); 0.006  | 1.39 (1.10, 1.76); 0.006 <sup>a</sup>  |
| <b>High genetic risk</b>         |            |                           |                           |                           |                                        |
| High (N=4899)                    | 207/29 725 | 2.37 (1.86, 3.02); <0.001 | 2.36 (1.85, 3.01); <0.001 | 2.42 (1.90, 3.08); <0.001 | 2.42 (1.90, 3.08); <0.001 <sup>a</sup> |
| Intermediate (N=6833)            | 323/40 972 | 2.49 (1.98, 3.12); <0.001 | 2.51 (2.00, 3.15); <0.001 | 2.50 (1.99, 3.14); <0.001 | 2.49 (1.99, 3.13); <0.001 <sup>a</sup> |
| Low (N=8830)                     | 419/52 976 | 2.62 (2.10, 3.27); <0.001 | 2.61 (2.09, 3.26); <0.001 | 2.57 (2.05, 3.20); <0.001 | 2.55 (2.04, 3.18); <0.001 <sup>a</sup> |
| <i>P value for trend</i>         |            | <i>P &lt;0.001</i>        | <i>P &lt;0.001</i>        | <i>P &lt;0.001</i>        | <i>P &lt;0.001</i>                     |
| <b>Mesor</b>                     |            |                           |                           |                           |                                        |
| <b>Low genetic risk</b>          |            |                           |                           |                           |                                        |

|                                  |            |                           |                           |                           |                                        |
|----------------------------------|------------|---------------------------|---------------------------|---------------------------|----------------------------------------|
| High (N=8028)                    | 112/49 093 | 1[Reference]              | 1[Reference]              | 1[Reference]              | 1[Reference]                           |
| Intermediate (N=6664)            | 125/40 575 | 1.36 (1.05, 1.75); 0.02   | 1.36 (1.05, 1.75); 0.02   | 1.32 (1.02, 1.70); 0.04   | 1.32 (1.02, 1.70); 0.04 <sup>a</sup>   |
| Low (N=6582)                     | 173/39 698 | 1.71 (1.35, 2.17); <0.001 | 1.71 (1.35, 2.17); <0.001 | 1.53 (1.21, 1.95); <0.001 | 1.54 (1.21, 1.95); <0.001 <sup>a</sup> |
| <b>Intermediate genetic risk</b> |            |                           |                           |                           |                                        |
| High (N=7875)                    | 156/48 094 | 1.45 (1.14, 1.85); 0.003  | 1.46 (1.14, 1.86); 0.002  | 1.47 (1.15, 1.88); 0.002  | 1.47 (1.16, 1.88); 0.002 <sup>a</sup>  |
| Intermediate (N=6707)            | 189/40 769 | 2.08 (1.65, 2.63); <0.001 | 2.09 (1.65, 2.64); <0.001 | 2.01 (1.59, 2.54); <0.001 | 2.01 (1.59, 2.54); <0.001 <sup>a</sup> |
| Low (N=6509)                     | 216/39 107 | 2.19 (1.75, 2.76); <0.001 | 2.18 (1.74, 2.74); <0.001 | 1.93 (1.54, 2.43); <0.001 | 1.94 (1.54, 2.44); <0.001 <sup>a</sup> |
| <b>High genetic risk</b>         |            |                           |                           |                           |                                        |
| High (N=7852)                    | 290/47 649 | 2.77 (2.23, 3.45); <0.001 | 2.78 (2.24, 3.46); <0.001 | 2.80 (2.25, 3.49); <0.001 | 2.81 (2.26, 3.49); <0.001 <sup>a</sup> |
| Intermediate (N=6385)            | 287/38 474 | 3.39 (2.72, 4.22); <0.001 | 3.38 (2.72, 4.22); <0.001 | 3.30 (2.65, 4.11); <0.001 | 3.30 (2.65, 4.11); <0.001 <sup>a</sup> |
| Low (N=6325)                     | 372/37 551 | 4.09 (3.31, 5.05); <0.001 | 4.09 (3.31, 5.05); <0.001 | 3.67 (2.96, 4.53); <0.001 | 3.67 (2.97, 4.54); <0.001 <sup>a</sup> |
| <i>P value for trend</i>         |            | <i>P &lt;0.001</i>        | <i>P &lt;0.001</i>        | <i>P &lt;0.001</i>        | <i>P &lt;0.001</i>                     |

Abbreviation: AF, atrial fibrillation; BMI, body mass index; CI, confidence interval; FDR, false-discovery rate; HR, hazard ratio.

Analyses were conducted using Cox proportional hazard models. **Model 1** was adjusted for age, sex, and first 10 principal components of ancestry. **Model 2** was adjusted as in model 1 and for Townsend deprivation index, recruitment centre, education level, and season of accelerometer wear. **Model 3** was adjusted as in model 2 and for BMI categories, healthy diet score, smoking status, alcohol intake, coffee consumption, tea consumption, hypertension, diabetes, and dyslipidemia. **Model 4** was adjusted as in model 3 and for sleep efficiency and sleep duration. Participants with prevalent AF were excluded. <sup>a</sup>P values remained significant after multiple testing with FDR method.

**Supplementary Table 5. Sensitivity analysis on the association of circadian rest-activity characteristics and genetic risk with Incident atrial fibrillation by using competing risk regression (Fine and Gray)**

| <b>Subgroup</b>                  | <b>No. of AF cases/ person-years</b> | <b>Model 1<br/>HR (95% CI); <i>P</i></b> | <b>Model 2<br/>HR (95% CI); <i>P</i></b> | <b>Model 3<br/>HR (95% CI); <i>P</i></b> | <b>Model 4<br/>HR (95% CI); <i>P</i></b> |
|----------------------------------|--------------------------------------|------------------------------------------|------------------------------------------|------------------------------------------|------------------------------------------|
| <b>Amplitude</b>                 |                                      |                                          |                                          |                                          |                                          |
| <b>Low genetic risk</b>          |                                      |                                          |                                          |                                          |                                          |
| High (N=7121)                    | 89/43 571                            | 1[Reference]                             | 1[Reference]                             | 1[Reference]                             | 1[Reference]                             |
| Intermediate (N=7673)            | 134/46 802                           | 1.38 (1.06, 1.80); 0.02                  | 1.38 (1.06, 1.81); 0.02                  | 1.35 (1.03, 1.76); 0.03                  | 1.34 (1.03, 1.75); 0.03 <sup>a</sup>     |
| Low (N=6480)                     | 187/38 993                           | 1.83 (1.42, 2.35); <0.001                | 1.83 (1.42, 2.35); <0.001                | 1.64 (1.27, 2.11); <0.001                | 1.62 (1.26, 2.09); <0.001 <sup>a</sup>   |
| <b>Intermediate genetic risk</b> |                                      |                                          |                                          |                                          |                                          |
| High (N=6976)                    | 134/42 643                           | 1.59 (1.21, 2.07); <0.001                | 1.59 (1.22, 2.08); <0.001                | 1.61 (1.23, 2.10); <0.001                | 1.61 (1.23, 2.10); <0.001 <sup>a</sup>   |
| Intermediate (N=7667)            | 183/46 750                           | 1.90 (1.48, 2.45); <0.001                | 1.91 (1.48, 2.46); <0.001                | 1.86 (1.45, 2.40); <0.001                | 1.86 (1.45, 2.40); <0.001 <sup>a</sup>   |
| Low (N=6448)                     | 244/38 578                           | 2.47 (1.93, 3.14); <0.001                | 2.45 (1.92, 3.13); <0.001                | 2.17 (1.70, 2.78); <0.001                | 2.15 (1.69, 2.75); <0.001 <sup>a</sup>   |
| <b>High genetic risk</b>         |                                      |                                          |                                          |                                          |                                          |
| High (N=7040)                    | 243/42 780                           | 2.86 (2.24, 3.64); <0.001                | 2.86 (2.25, 3.65); <0.001                | 2.88 (2.26, 3.68); <0.001                | 2.88 (2.26, 3.67); <0.001 <sup>a</sup>   |
| Intermediate (N=7316)            | 313/44 078                           | 3.54 (2.80, 4.48); <0.001                | 3.55 (2.80, 4.49); <0.001                | 3.48 (2.75, 4.40); <0.001                | 3.48 (2.75, 4.40); <0.001 <sup>a</sup>   |
| Low (N=6206)                     | 393/36 816                           | 4.31 (3.43, 5.43); <0.001                | 4.32 (3.43, 5.44); <0.001                | 3.89 (3.08, 4.90); <0.001                | 3.85 (3.05, 4.85); <0.001 <sup>a</sup>   |
| <i>P value for trend</i>         |                                      | <i>P</i> <0.001                          | <i>P</i> <0.001                          | <i>P</i> <0.001                          | <i>P</i> <0.001                          |
| <b>Acrophase</b>                 |                                      |                                          |                                          |                                          |                                          |
| <b>Low genetic risk</b>          |                                      |                                          |                                          |                                          |                                          |
| Advanced (N=4386)                | 109/26 489                           | 1[Reference]                             | 1[Reference]                             | 1[Reference]                             | 1[Reference]                             |
| Intermediate (N=6830)            | 133/41 374                           | 1.00 (0.77, 1.29); 0.98                  | 1.02 (0.79, 1.31); 0.91                  | 1.04 (0.80, 1.33); 0.79                  | 1.04 (0.81, 1.34); 0.76                  |
| Delayed (N=10 058)               | 168/61 503                           | 0.98 (0.77, 1.25); 0.87                  | 1.00 (0.79, 1.28); 0.99                  | 1.01 (0.79, 1.29); 0.95                  | 1.02 (0.80, 1.29); 0.90                  |
| <b>Intermediate genetic risk</b> |                                      |                                          |                                          |                                          |                                          |



|                                  |            |                           |                           |                           |                                        |
|----------------------------------|------------|---------------------------|---------------------------|---------------------------|----------------------------------------|
| Advanced (N=4291)                | 113/25 949 | 1.11 (0.85, 1.44); 0.45   | 1.12 (0.86, 1.45); 0.42   | 1.12 (0.86, 1.46); 0.40   | 1.12 (0.86, 1.46); 0.40                |
| Intermediate (N=6613)            | 180/40 071 | 1.41 (1.11, 1.80); 0.004  | 1.44 (1.14, 1.83); 0.003  | 1.47 (1.16, 1.86); 0.002  | 1.48 (1.16, 1.88); 0.001 <sup>a</sup>  |
| Delayed (N=10 187)               | 268/61 950 | 1.56 (1.25, 1.95); <0.001 | 1.58 (1.27, 1.98); <0.001 | 1.59 (1.27, 1.98); <0.001 | 1.61 (1.28, 2.01); <0.001 <sup>a</sup> |
| <b>High genetic risk</b>         |            |                           |                           |                           |                                        |
| Advanced (N=4066)                | 199/24 289 | 2.12 (1.68, 2.68); <0.001 | 2.14 (1.69, 2.70); <0.001 | 2.18 (1.73, 2.75); <0.001 | 2.18 (1.72, 2.75); <0.001 <sup>a</sup> |
| Intermediate (N=6583)            | 322/39 582 | 2.63 (2.12, 3.27); <0.001 | 2.68 (2.15, 3.33); <0.001 | 2.75 (2.21, 3.43); <0.001 | 2.77 (2.23, 3.45); <0.001 <sup>a</sup> |
| Delayed (N=9913)                 | 428/59 802 | 2.63 (2.13, 3.25); <0.001 | 2.67 (2.16, 3.30); <0.001 | 2.70 (2.18, 3.34); <0.001 | 2.72 (2.20, 3.37); <0.001 <sup>a</sup> |
| <i>P value for trend</i>         |            | <i>P &lt;0.001</i>        | <i>P &lt;0.001</i>        | <i>P &lt;0.001</i>        | <i>P &lt;0.001</i>                     |
| <b>Pseudo-F</b>                  |            |                           |                           |                           |                                        |
| <b>Low genetic risk</b>          |            |                           |                           |                           |                                        |
| High (N=5026)                    | 96/30 676  | 1[Reference]              | 1[Reference]              | 1[Reference]              | 1[Reference]                           |
| Intermediate (N=7092)            | 141/43 111 | 1.00 (0.77, 1.30); >0.99  | 1.00 (0.77, 1.30); >0.99  | 1.00 (0.77, 1.29); 0.97   | 0.99 (0.77, 1.28); 0.95                |
| Low (N=9156)                     | 173/55 579 | 1.00 (0.78, 1.28); >0.99  | 1.00 (0.78, 1.29); 0.97   | 0.98 (0.77, 1.26); 0.89   | 0.97 (0.76, 1.25); 0.84                |
| <b>Intermediate genetic risk</b> |            |                           |                           |                           |                                        |
| High (N=5082)                    | 136/30 905 | 1.43 (1.10, 1.85); 0.008  | 1.44 (1.11, 1.87); 0.007  | 1.44 (1.11, 1.88); 0.006  | 1.45 (1.11, 1.88); 0.006 <sup>a</sup>  |
| Intermediate (N=6959)            | 181/42 269 | 1.36 (1.06, 1.74); 0.02   | 1.36 (1.06, 1.74); 0.02   | 1.34 (1.05, 1.72); 0.02   | 1.34 (1.05, 1.72); 0.02 <sup>a</sup>   |
| Low (N=9050)                     | 244/54 797 | 1.45 (1.14, 1.83); 0.002  | 1.44 (1.14, 1.83); 0.002  | 1.41 (1.12, 1.79); 0.004  | 1.40 (1.11, 1.78); 0.005 <sup>a</sup>  |
| <b>High genetic risk</b>         |            |                           |                           |                           |                                        |
| High (N=4899)                    | 207/29 725 | 2.37 (1.86, 3.02); <0.001 | 2.37 (1.86, 3.02); <0.001 | 2.42 (1.90, 3.08); <0.001 | 2.42 (1.90, 3.08); <0.001 <sup>a</sup> |
| Intermediate (N=6833)            | 323/40 972 | 2.50 (1.99, 3.14); <0.001 | 2.52 (2.01, 3.17); <0.001 | 2.52 (2.01, 3.16); <0.001 | 2.51 (2.00, 3.15); <0.001 <sup>a</sup> |
| Low (N=8830)                     | 419/52 976 | 2.63 (2.11, 3.28); <0.001 | 2.63 (2.10, 3.28); <0.001 | 2.59 (2.07, 3.23); <0.001 | 2.57 (2.06, 3.20); <0.001 <sup>a</sup> |
| <i>P value for trend</i>         |            | <i>P &lt;0.001</i>        | <i>P &lt;0.001</i>        | <i>P &lt;0.001</i>        | <i>P &lt;0.001</i>                     |
| <b>Mesor</b>                     |            |                           |                           |                           |                                        |
| <b>Low genetic risk</b>          |            |                           |                           |                           |                                        |

|                                  |            |                           |                           |                           |                                        |
|----------------------------------|------------|---------------------------|---------------------------|---------------------------|----------------------------------------|
| High (N=8028)                    | 112/49 093 | 1[Reference]              | 1[Reference]              | 1[Reference]              | 1[Reference]                           |
| Intermediate (N=6664)            | 125/40 575 | 1.35 (1.05, 1.74); 0.02   | 1.36 (1.05, 1.75); 0.02   | 1.31 (1.02, 1.69); 0.04   | 1.31 (1.01, 1.69); 0.04 <sup>a</sup>   |
| Low (N=6582)                     | 173/39 698 | 1.69 (1.34, 2.15); <0.001 | 1.70 (1.34, 2.15); <0.001 | 1.52 (1.20, 1.93); <0.001 | 1.52 (1.20, 1.92); <0.001 <sup>a</sup> |
| <b>Intermediate genetic risk</b> |            |                           |                           |                           |                                        |
| High (N=7875)                    | 156/48 094 | 1.46 (1.14, 1.85); 0.002  | 1.46 (1.15, 1.86); 0.002  | 1.48 (1.16, 1.88); 0.002  | 1.48 (1.16, 1.88); 0.002 <sup>a</sup>  |
| Intermediate (N=6707)            | 189/40 769 | 2.08 (1.65, 2.63); <0.001 | 2.09 (1.66, 2.64); <0.001 | 2.01 (1.59, 2.54); <0.001 | 2.01 (1.59, 2.54); <0.001 <sup>a</sup> |
| Low (N=6509)                     | 216/39 107 | 2.17 (1.73, 2.73); <0.001 | 2.16 (1.72, 2.72); <0.001 | 1.93 (1.53, 2.42); <0.001 | 1.93 (1.53, 2.42); <0.001 <sup>a</sup> |
| <b>High genetic risk</b>         |            |                           |                           |                           |                                        |
| High (N=7852)                    | 290/47 649 | 2.78 (2.23, 3.45); <0.001 | 2.79 (2.24, 3.47); <0.001 | 2.82 (2.27, 3.50); <0.001 | 2.82 (2.27, 3.50); <0.001 <sup>a</sup> |
| Intermediate (N=6385)            | 287/38 474 | 3.39 (2.72, 4.21); <0.001 | 3.39 (2.72, 4.21); <0.001 | 3.30 (2.65, 4.10); <0.001 | 3.29 (2.65, 4.10); <0.001 <sup>a</sup> |
| Low (N=6325)                     | 372/37 551 | 4.04 (3.27, 5.00); <0.001 | 4.05 (3.28, 5.00); <0.001 | 3.64 (2.95, 4.50); <0.001 | 3.64 (2.95, 4.50); <0.001 <sup>a</sup> |
| <i>P value for trend</i>         |            | <i>P &lt;0.001</i>        | <i>P &lt;0.001</i>        | <i>P &lt;0.001</i>        | <i>P &lt;0.001</i>                     |

Abbreviation: AF, atrial fibrillation; BMI, body mass index; CI, confidence interval; FDR, false-discovery rate; HR, hazard ratio.

Analyses were conducted using Cox proportional hazard models. **Model 1** was adjusted for age, sex, and first 10 principal components of ancestry. **Model 2** was adjusted as in model 1 and for Townsend deprivation index, recruitment centre, education level, and season of accelerometer wear. **Model 3** was adjusted as in model 2 and for BMI categories, healthy diet score, smoking status, alcohol intake, coffee consumption, tea consumption, hypertension, diabetes, and dyslipidemia. **Model 4** was adjusted as in model 3 and for sleep efficiency and sleep duration. Participants with prevalent AF were excluded. <sup>a</sup>P values remained significant after multiple testing with FDR method.

**Supplementary Table 6. Sensitivity analysis on the associations of circadian rest-activity characteristics and genetic risk with incident atrial fibrillation among participants without any missing covariate data**

| <b>Subgroup</b>                  | <b>No. of AF cases/ person-years</b> | <b>Model 1<br/>HR (95% CI); <i>P</i></b> | <b>Model 2<br/>HR (95% CI); <i>P</i></b> | <b>Model 3<br/>HR (95% CI); <i>P</i></b> | <b>Model 4<br/>HR (95% CI); <i>P</i></b> |
|----------------------------------|--------------------------------------|------------------------------------------|------------------------------------------|------------------------------------------|------------------------------------------|
| <b>Amplitude</b>                 |                                      |                                          |                                          |                                          |                                          |
| <b>Low genetic risk</b>          |                                      |                                          |                                          |                                          |                                          |
| High (N=7059)                    | 89/43 195                            | 1[Reference]                             | 1[Reference]                             | 1[Reference]                             | 1[Reference]                             |
| Intermediate (N=7593)            | 133/46 312                           | 1.37 (1.05, 1.79); 0.02                  | 1.37 (1.05, 1.80); 0.02                  | 1.34 (1.02, 1.75); 0.03                  | 1.34 (1.02, 1.75); 0.04 <sup>a</sup>     |
| Low (N=6388)                     | 183/38 428                           | 1.82 (1.41, 2.34); <0.001                | 1.82 (1.41, 2.34); <0.001                | 1.63 (1.26, 2.10); <0.001                | 1.61 (1.25, 2.08); <0.001 <sup>a</sup>   |
| <b>Intermediate genetic risk</b> |                                      |                                          |                                          |                                          |                                          |
| High (N=6909)                    | 131/42 229                           | 1.55 (1.18, 2.03); 0.001                 | 1.55 (1.19, 2.03); 0.001                 | 1.57 (1.20, 2.05); 0.001                 | 1.56 (1.20, 2.05); 0.001 <sup>a</sup>    |
| Intermediate (N=7584)            | 182/46 238                           | 1.89 (1.47, 2.44); <0.001                | 1.89 (1.47, 2.44); <0.001                | 1.85 (1.43, 2.38); <0.001                | 1.85 (1.44, 2.39); <0.001 <sup>a</sup>   |
| Low (N=6358)                     | 240/38 011                           | 2.47 (1.93, 3.15); <0.001                | 2.45 (1.92, 3.13); <0.001                | 2.16 (1.69, 2.76); <0.001                | 2.15 (1.68, 2.74); <0.001 <sup>a</sup>   |
| <b>High genetic risk</b>         |                                      |                                          |                                          |                                          |                                          |
| High (N=6975)                    | 242/42 370                           | 2.84 (2.22, 3.62); <0.001                | 2.84 (2.22, 3.62); <0.001                | 2.85 (2.24, 3.64); <0.001                | 2.86 (2.24, 3.64); <0.001 <sup>a</sup>   |
| Intermediate (N=7223)            | 305/43 519                           | 3.47 (2.74, 4.39); <0.001                | 3.47 (2.74, 4.39); <0.001                | 3.41 (2.69, 4.32); <0.001                | 3.40 (2.69, 4.31); <0.001 <sup>a</sup>   |
| Low (N=6117)                     | 389/36 283                           | 4.34 (3.45, 5.47); <0.001                | 4.34 (3.45, 5.47); <0.001                | 3.89 (3.09, 4.91); <0.001                | 3.85 (3.06, 4.86); <0.001 <sup>a</sup>   |
| <i>P value for trend</i>         |                                      | <i>P</i> <0.001                          | <i>P</i> <0.001                          | <i>P</i> <0.001                          | <i>P</i> <0.001                          |
| <b>Acrophase</b>                 |                                      |                                          |                                          |                                          |                                          |
| <b>Low genetic risk</b>          |                                      |                                          |                                          |                                          |                                          |
| Advanced (N=4340)                | 107/26 214                           | 1[Reference]                             | 1[Reference]                             | 1[Reference]                             | 1[Reference]                             |
| Intermediate (N=6764)            | 132/40 967                           | 1.01 (0.78, 1.30); 0.96                  | 1.02 (0.79, 1.32); 0.86                  | 1.04 (0.81, 1.34); 0.77                  | 1.05 (0.81, 1.35); 0.74                  |
| Delayed (N=9936)                 | 166/60 755                           | 0.99 (0.77, 1.26); 0.92                  | 1.01 (0.79, 1.29); 0.95                  | 1.02 (0.80, 1.30); 0.91                  | 1.02 (0.80, 1.30); 0.87                  |
| <b>Intermediate genetic risk</b> |                                      |                                          |                                          |                                          |                                          |

|                                  |            |                           |                           |                           |                                        |
|----------------------------------|------------|---------------------------|---------------------------|---------------------------|----------------------------------------|
| Advanced (N=4243)                | 111/25 656 | 1.11 (0.85, 1.45); 0.45   | 1.11 (0.85, 1.45); 0.43   | 1.12 (0.86, 1.46); 0.41   | 1.12 (0.86, 1.46); 0.42                |
| Intermediate (N=6547)            | 179/39 658 | 1.43 (1.12, 1.81); 0.004  | 1.45 (1.14, 1.85); 0.002  | 1.48 (1.16, 1.88); 0.002  | 1.48 (1.17, 1.89); 0.001 <sup>a</sup>  |
| Delayed (N=10 061)               | 263/61 165 | 1.56 (1.25, 1.96); <0.001 | 1.58 (1.26, 1.99); <0.001 | 1.58 (1.26, 1.98); <0.001 | 1.59 (1.27, 2.00); <0.001 <sup>a</sup> |
| <b>High genetic risk</b>         |            |                           |                           |                           |                                        |
| Advanced (N=4014)                | 198/23 958 | 2.15 (1.70, 2.72); <0.001 | 2.17 (1.72, 2.75); <0.001 | 2.20 (1.74, 2.78); <0.001 | 2.20 (1.74, 2.78); <0.001 <sup>a</sup> |
| Intermediate (N=6506)            | 317/39 127 | 2.64 (2.12, 3.29); <0.001 | 2.69 (2.16, 3.35); <0.001 | 2.75 (2.21, 3.43); <0.001 | 2.77 (2.22, 3.45); <0.001 <sup>a</sup> |
| Delayed (N=9795)                 | 421/59 087 | 2.63 (2.13, 3.26); <0.001 | 2.67 (2.16, 3.31); <0.001 | 2.69 (2.17, 3.33); <0.001 | 2.71 (2.19, 3.35); <0.001 <sup>a</sup> |
| <i>P value for trend</i>         |            | <i>P &lt;0.001</i>        | <i>P &lt;0.001</i>        | <i>P &lt;0.001</i>        | <i>P &lt;0.001</i>                     |
| <b>F-Pseudo</b>                  |            |                           |                           |                           |                                        |
| <b>Low genetic risk</b>          |            |                           |                           |                           |                                        |
| High (N=4970)                    | 95/30 332  | 1[Reference]              | 1[Reference]              | 1[Reference]              | 1[Reference]                           |
| Intermediate (N=7015)            | 140/42 636 | 1.00 (0.77, 1.30); 0.99   | 1.00 (0.77, 1.29); 0.99   | 1.00 (0.77, 1.29); 0.97   | 1.00 (0.77, 1.29); 0.97                |
| Low (N=9055)                     | 170/54 967 | 0.99 (0.77, 1.27); 0.93   | 0.99 (0.77, 1.28); 0.96   | 0.97 (0.76, 1.25); 0.84   | 0.97 (0.75, 1.25); 0.80                |
| <b>Intermediate genetic risk</b> |            |                           |                           |                           |                                        |
| High (N=5022)                    | 134/30 533 | 1.42 (1.09, 1.85); 0.009  | 1.43 (1.10, 1.86); 0.008  | 1.44 (1.11, 1.87); 0.007  | 1.44 (1.11, 1.88); 0.006 <sup>a</sup>  |
| Intermediate (N=6875)            | 178/41 748 | 1.34 (1.04, 1.72); 0.02   | 1.34 (1.05, 1.72); 0.02   | 1.33 (1.04, 1.71); 0.03   | 1.33 (1.04, 1.71); 0.03 <sup>a</sup>   |
| Low (N=8954)                     | 241/54 197 | 1.43 (1.13, 1.82); 0.003  | 1.43 (1.13, 1.81); 0.003  | 1.40 (1.10, 1.77); 0.006  | 1.39 (1.10, 1.76); 0.007 <sup>a</sup>  |
| <b>High genetic risk</b>         |            |                           |                           |                           |                                        |
| High (N=4832)                    | 204/29 332 | 2.37 (1.86, 3.02); <0.001 | 2.37 (1.85, 3.02); <0.001 | 2.42 (1.90, 3.09); <0.001 | 2.43 (1.90, 3.10); <0.001 <sup>a</sup> |
| Intermediate (N=6747)            | 317/40 439 | 2.48 (1.97, 3.11); <0.001 | 2.50 (1.99, 3.15); <0.001 | 2.49 (1.98, 3.13); <0.001 | 2.49 (1.98, 3.13); <0.001 <sup>a</sup> |
| Low (N=8736)                     | 415/52 400 | 2.61 (2.09, 3.27); <0.001 | 2.60 (2.08, 3.26); <0.001 | 2.56 (2.05, 3.21); <0.001 | 2.55 (2.04, 3.19); <0.001 <sup>a</sup> |
| <i>P value for trend</i>         |            | <i>P &lt;0.001</i>        | <i>P &lt;0.001</i>        | <i>P &lt;0.001</i>        | <i>P &lt;0.001</i>                     |
| <b>Mesor</b>                     |            |                           |                           |                           |                                        |
| <b>Low genetic risk</b>          |            |                           |                           |                           |                                        |

|                                  |            |                           |                           |                           |                                        |
|----------------------------------|------------|---------------------------|---------------------------|---------------------------|----------------------------------------|
| High (N=7956)                    | 112/48 647 | 1[Reference]              | 1[Reference]              | 1[Reference]              | 1[Reference]                           |
| Intermediate (N=6597)            | 124/40 165 | 1.35 (1.04, 1.74); 0.02   | 1.35 (1.05, 1.75); 0.02   | 1.31 (1.01, 1.69); 0.04   | 1.31 (1.01, 1.69); 0.04 <sup>a</sup>   |
| Low (N=6487)                     | 169/39 123 | 1.69 (1.33, 2.14); <0.001 | 1.69 (1.33, 2.14); <0.001 | 1.51 (1.19, 1.92); <0.001 | 1.52 (1.19, 1.93); <0.001 <sup>a</sup> |
| <b>Intermediate genetic risk</b> |            |                           |                           |                           |                                        |
| High (N=7793)                    | 153/47 584 | 1.43 (1.12, 1.83); 0.004  | 1.44 (1.13, 1.83); 0.004  | 1.45 (1.14, 1.85); 0.003  | 1.45 (1.14, 1.85); 0.003 <sup>a</sup>  |
| Intermediate (N=6629)            | 186/40 295 | 2.05 (1.63, 2.60); <0.001 | 2.06 (1.63, 2.61); <0.001 | 1.98 (1.57, 2.51); <0.001 | 1.99 (1.57, 2.51); <0.001 <sup>a</sup> |
| Low (N=6429)                     | 214/38 600 | 2.19 (1.74, 2.75); <0.001 | 2.17 (1.73, 2.73); <0.001 | 1.93 (1.53, 2.43); <0.001 | 1.93 (1.54, 2.43); <0.001 <sup>a</sup> |
| <b>High genetic risk</b>         |            |                           |                           |                           |                                        |
| High (N=7778)                    | 288/47 184 | 2.75 (2.21, 3.42); <0.001 | 2.76 (2.22, 3.44); <0.001 | 2.79 (2.24, 3.47); <0.001 | 2.79 (2.25, 3.47); <0.001 <sup>a</sup> |
| Intermediate (N=6309)            | 280/38 016 | 3.32 (2.67, 4.14); <0.001 | 3.32 (2.66, 4.13); <0.001 | 3.23 (2.59, 4.03); <0.001 | 3.23 (2.60, 4.03); <0.001 <sup>a</sup> |
| Low (N=6228)                     | 368/36 972 | 4.09 (3.31, 5.06); <0.001 | 4.09 (3.31, 5.06); <0.001 | 3.67 (2.97, 4.54); <0.001 | 3.67 (2.97, 4.54); <0.001 <sup>a</sup> |
| <i>P value for trend</i>         |            | <i>P &lt;0.001</i>        | <i>P &lt;0.001</i>        | <i>P &lt;0.001</i>        | <i>P &lt;0.001</i>                     |

Abbreviation: AF, atrial fibrillation; BMI, body mass index; CI, confidence interval; FDR, false-discovery rate; HR, hazard ratio.

Analyses were conducted using Cox proportional hazard models. **Model 1** was adjusted for age, sex, and first 10 principal components of ancestry. **Model 2** was adjusted as in model 1 and for Townsend deprivation index, recruitment centre, education level, and season of accelerometer wear. **Model 3** was adjusted as in model 2 and for BMI categories, healthy diet score, smoking status, alcohol intake, coffee consumption, tea consumption, hypertension, diabetes, and dyslipidemia. **Model 4** was adjusted as in model 3 and for sleep efficiency and sleep duration. Participants with prevalent AF were excluded. <sup>a</sup>P values remained significant after multiple testing with FDR method.

**Supplementary Table 7. Sensitivity analysis on the associations of circadian rest-activity characteristics and genetic risk with incident atrial fibrillation by excluding events that occurred within the first year of follow-up**

| <b>Subgroup</b>                  | <b>No. of AF cases/ person-years</b> | <b>Model 1<br/>HR (95% CI); <i>P</i></b> | <b>Model 2<br/>HR (95% CI); <i>P</i></b> | <b>Model 3<br/>HR (95% CI); <i>P</i></b> | <b>Model 4<br/>HR (95% CI); <i>P</i></b> |
|----------------------------------|--------------------------------------|------------------------------------------|------------------------------------------|------------------------------------------|------------------------------------------|
| <b>Amplitude</b>                 |                                      |                                          |                                          |                                          |                                          |
| <b>Low genetic risk</b>          |                                      |                                          |                                          |                                          |                                          |
| High (N=7111)                    | 79/43 564                            | 1[Reference]                             | 1[Reference]                             | 1[Reference]                             | 1[Reference]                             |
| Intermediate (N=7658)            | 119/46 795                           | 1.38 (1.04, 1.83); 0.03                  | 1.38 (1.04, 1.83); 0.03                  | 1.35 (1.01, 1.79); 0.04                  | 1.34 (1.01, 1.79); 0.04 <sup>a</sup>     |
| Low (N=6457)                     | 164/38 981                           | 1.83 (1.40, 2.39); <0.001                | 1.82 (1.39, 2.38); <0.001                | 1.64 (1.25, 2.14); <0.001                | 1.63 (1.24, 2.13); <0.001 <sup>a</sup>   |
| <b>Intermediate genetic risk</b> |                                      |                                          |                                          |                                          |                                          |
| High (N=6962)                    | 120/42 635                           | 1.59 (1.20, 2.11); 0.001                 | 1.60 (1.20, 2.12); 0.001                 | 1.61 (1.21, 2.14); 0.001                 | 1.61 (1.21, 2.14); 0.001 <sup>a</sup>    |
| Intermediate (N=7642)            | 158/46 738                           | 1.84 (1.40, 2.41); <0.001                | 1.84 (1.41, 2.42); <0.001                | 1.80 (1.37, 2.36); <0.001                | 1.80 (1.38, 2.36); <0.001 <sup>a</sup>   |
| Low (N=6415)                     | 211/38 561                           | 2.43 (1.88, 3.15); <0.001                | 2.41 (1.86, 3.13); <0.001                | 2.13 (1.64, 2.77); <0.001                | 2.12 (1.63, 2.75); <0.001 <sup>a</sup>   |
| <b>High genetic risk</b>         |                                      |                                          |                                          |                                          |                                          |
| High (N=7001)                    | 204/42 758                           | 2.70 (2.08, 3.50); <0.001                | 2.70 (2.09, 3.51); <0.001                | 2.72 (2.10, 3.53); <0.001                | 2.72 (2.10, 3.53); <0.001 <sup>a</sup>   |
| Intermediate (N=7272)            | 269/44 053                           | 3.43 (2.67, 4.41); <0.001                | 3.43 (2.66, 4.40); <0.001                | 3.36 (2.62, 4.32); <0.001                | 3.36 (2.61, 4.32); <0.001 <sup>a</sup>   |
| Low (N=6155)                     | 342/36 793                           | 4.29 (3.36, 5.48); <0.001                | 4.28 (3.35, 5.47); <0.001                | 3.86 (3.01, 4.93); <0.001                | 3.83 (2.99, 4.90); <0.001 <sup>a</sup>   |
| <i>P value for trend</i>         |                                      | <i>P</i> <0.001                          | <i>P</i> <0.001                          | <i>P</i> <0.001                          | <i>P</i> <0.001                          |
| <b>Acrophase</b>                 |                                      |                                          |                                          |                                          |                                          |
| <b>Low genetic risk</b>          |                                      |                                          |                                          |                                          |                                          |
| Advanced (N=4373)                | 96/26 482                            | 1[Reference]                             | 1[Reference]                             | 1[Reference]                             | 1[Reference]                             |
| Intermediate (N=6813)            | 116/41 365                           | 0.98 (0.75, 1.29); 0.89                  | 1.00 (0.76, 1.31); >0.99                 | 1.02 (0.78, 1.33); 0.90                  | 1.02 (0.78, 1.34); 0.87                  |
| Delayed (N=10 040)               | 150/61 493                           | 0.99 (0.76, 1.28); 0.92                  | 1.01 (0.78, 1.30); 0.95                  | 1.02 (0.78, 1.31); 0.91                  | 1.02 (0.79, 1.32); 0.87                  |
| <b>Intermediate genetic risk</b> |                                      |                                          |                                          |                                          |                                          |

|                                  |            |                           |                           |                           |                                        |
|----------------------------------|------------|---------------------------|---------------------------|---------------------------|----------------------------------------|
| Advanced (N=4277)                | 99/25 942  | 1.10 (0.83, 1.45); 0.51   | 1.10 (0.83, 1.46); 0.49   | 1.11 (0.84, 1.47); 0.48   | 1.10 (0.83, 1.46); 0.50                |
| Intermediate (N=6590)            | 157/40 059 | 1.39 (1.08, 1.79); 0.01   | 1.42 (1.10, 1.83); 0.007  | 1.44 (1.11, 1.85); 0.005  | 1.44 (1.12, 1.86); 0.005 <sup>a</sup>  |
| Delayed (N=10 152)               | 233/61 933 | 1.53 (1.21, 1.94); <0.001 | 1.55 (1.22, 1.97); <0.001 | 1.55 (1.22, 1.97); <0.001 | 1.57 (1.23, 1.99); <0.001 <sup>a</sup> |
| <b>High genetic risk</b>         |            |                           |                           |                           |                                        |
| Advanced (N=4032)                | 165/24 270 | 1.99 (1.55, 2.56); <0.001 | 2.01 (1.56, 2.59); <0.001 | 2.04 (1.59, 2.63); <0.001 | 2.04 (1.59, 2.63); <0.001 <sup>a</sup> |
| Intermediate (N=6540)            | 279/39 558 | 2.58 (2.05, 3.26); <0.001 | 2.63 (2.09, 3.32); <0.001 | 2.70 (2.14, 3.40); <0.001 | 2.71 (2.15, 3.43); <0.001 <sup>a</sup> |
| Delayed (N=9856)                 | 371/59 776 | 2.58 (2.06, 3.23); <0.001 | 2.62 (2.09, 3.28); <0.001 | 2.63 (2.10, 3.30); <0.001 | 2.65 (2.11, 3.32); <0.001 <sup>a</sup> |
| <i>P value for trend</i>         |            | <i>P &lt;0.001</i>        | <i>P &lt;0.001</i>        | <i>P &lt;0.001</i>        | <i>P &lt;0.001</i>                     |
| <b>F-Pseudo</b>                  |            |                           |                           |                           |                                        |
| <b>Low genetic risk</b>          |            |                           |                           |                           |                                        |
| High (N=5019)                    | 89/30 672  | 1[Reference]              | 1[Reference]              | 1[Reference]              | 1[Reference]                           |
| Intermediate (N=7074)            | 123/43 103 | 0.94 (0.71, 1.23); 0.64   | 0.94 (0.71, 1.23); 0.63   | 0.93 (0.71, 1.23); 0.62   | 0.93 (0.71, 1.23); 0.63                |
| Low (N=9133)                     | 150/55 565 | 0.93 (0.72, 1.21); 0.61   | 0.94 (0.72, 1.22); 0.64   | 0.92 (0.71, 1.20); 0.54   | 0.92 (0.71, 1.19); 0.52                |
| <b>Intermediate genetic risk</b> |            |                           |                           |                           |                                        |
| High (N=5060)                    | 114/30 894 | 1.29 (0.98, 1.70); 0.07   | 1.30 (0.99, 1.72); 0.06   | 1.31 (0.99, 1.72); 0.06   | 1.31 (0.99, 1.73); 0.06                |
| Intermediate (N=6933)            | 155/42 255 | 1.24 (0.96, 1.61); 0.11   | 1.24 (0.96, 1.61); 0.10   | 1.23 (0.95, 1.60); 0.12   | 1.23 (0.95, 1.60); 0.12                |
| Low (N=9026)                     | 220/54 784 | 1.40 (1.10, 1.79); 0.007  | 1.40 (1.09, 1.79); 0.008  | 1.37 (1.07, 1.75); 0.01   | 1.36 (1.06, 1.74); 0.02 <sup>a</sup>   |
| <b>High genetic risk</b>         |            |                           |                           |                           |                                        |
| High (N=4871)                    | 179/29 710 | 2.21 (1.72, 2.85); <0.001 | 2.21 (1.71, 2.85); <0.001 | 2.26 (1.75, 2.91); <0.001 | 2.26 (1.76, 2.92); <0.001 <sup>a</sup> |
| Intermediate (N=6789)            | 279/40 951 | 2.32 (1.83, 2.95); <0.001 | 2.35 (1.85, 2.98); <0.001 | 2.34 (1.84, 2.97); <0.001 | 2.34 (1.84, 2.97); <0.001 <sup>a</sup> |
| Low (N=8768)                     | 357/52 944 | 2.42 (1.92, 3.05); <0.001 | 2.41 (1.91, 3.04); <0.001 | 2.37 (1.88, 3.00); <0.001 | 2.36 (1.87, 2.98); <0.001 <sup>a</sup> |
| <i>P value for trend</i>         |            | <i>P &lt;0.001</i>        | <i>P &lt;0.001</i>        | <i>P &lt;0.001</i>        | <i>P &lt;0.001</i>                     |
| <b>Mesor</b>                     |            |                           |                           |                           |                                        |
| <b>Low genetic risk</b>          |            |                           |                           |                           |                                        |



|                                  |            |                           |                           |                           |                                        |
|----------------------------------|------------|---------------------------|---------------------------|---------------------------|----------------------------------------|
| High (N=8017)                    | 101/49 085 | 1[Reference]              | 1[Reference]              | 1[Reference]              | 1[Reference]                           |
| Intermediate (N=6650)            | 111/40 570 | 1.33 (1.02, 1.74); 0.04   | 1.34 (1.02, 1.75); 0.04   | 1.30 (0.99, 1.70); 0.06   | 1.30 (0.99, 1.70); 0.06                |
| Low (N=6559)                     | 150/39 685 | 1.65 (1.28, 2.12); <0.001 | 1.65 (1.28, 2.12); <0.001 | 1.48 (1.15, 1.90); 0.003  | 1.48 (1.15, 1.91); 0.002 <sup>a</sup>  |
| <b>Intermediate genetic risk</b> |            |                           |                           |                           |                                        |
| High (N=7863)                    | 144/48 087 | 1.49 (1.15, 1.92); 0.002  | 1.49 (1.16, 1.93); 0.002  | 1.51 (1.17, 1.94); 0.002  | 1.51 (1.17, 1.94); 0.002 <sup>a</sup>  |
| Intermediate (N=6677)            | 159/40 754 | 1.94 (1.51, 2.49); <0.001 | 1.94 (1.52, 2.50); <0.001 | 1.87 (1.46, 2.40); <0.001 | 1.87 (1.46, 2.41); <0.001 <sup>a</sup> |
| Low (N=6479)                     | 186/39 093 | 2.10 (1.65, 2.68); <0.001 | 2.08 (1.63, 2.66); <0.001 | 1.85 (1.45, 2.36); <0.001 | 1.85 (1.45, 2.37); <0.001 <sup>a</sup> |
| <b>High genetic risk</b>         |            |                           |                           |                           |                                        |
| High (N=7811)                    | 249/47 625 | 2.64 (2.10, 3.33); <0.001 | 2.66 (2.11, 3.35); <0.001 | 2.68 (2.13, 3.38); <0.001 | 2.68 (2.13, 3.38); <0.001 <sup>a</sup> |
| Intermediate (N=6346)            | 248/38 453 | 3.25 (2.58, 4.10); <0.001 | 3.25 (2.58, 4.09); <0.001 | 3.17 (2.51, 3.99); <0.001 | 3.17 (2.51, 3.99); <0.001 <sup>a</sup> |
| Low (N=6271)                     | 318/37 527 | 3.90 (3.12, 4.88); <0.001 | 3.89 (3.11, 4.87); <0.001 | 3.50 (2.79, 4.38); <0.001 | 3.50 (2.80, 4.39); <0.001 <sup>a</sup> |
| <i>P value for trend</i>         |            | <i>P &lt;0.001</i>        | <i>P &lt;0.001</i>        | <i>P &lt;0.001</i>        | <i>P &lt;0.001</i>                     |

Abbreviation: AF, atrial fibrillation; BMI, body mass index; CI, confidence interval; FDR, false-discovery rate; HR, hazard ratio.

Analyses were conducted using Cox proportional hazard models. **Model 1** was adjusted for age, sex, and first 10 principal components of ancestry. **Model 2** was adjusted as in model 1 and for Townsend deprivation index, recruitment centre, education level, and season of accelerometer wear. **Model 3** was adjusted as in model 2 and for BMI categories, healthy diet score, smoking status, alcohol intake, coffee consumption, tea consumption, hypertension, diabetes, and dyslipidemia. **Model 4** was adjusted as in model 3 and for sleep efficiency and sleep duration. Participants with prevalent AF were excluded. <sup>a</sup>P values remained significant after multiple testing with FDR method.

**Supplementary Table 8. Sensitivity analysis on the associations of circadian rest-activity characteristics and genetic risk with atrial fibrillation by censoring up to Dec 31, 2019**

| <b>Subgroup</b>                  | <b>No. of AF cases/ person-years</b> | <b>Model 1<br/>HR (95% CI); <i>P</i></b> | <b>Model 2<br/>HR (95% CI); <i>P</i></b> | <b>Model 3<br/>HR (95% CI); <i>P</i></b> | <b>Model 4<br/>HR (95% CI); <i>P</i></b> |
|----------------------------------|--------------------------------------|------------------------------------------|------------------------------------------|------------------------------------------|------------------------------------------|
| <b>Amplitude</b>                 |                                      |                                          |                                          |                                          |                                          |
| <b>Low genetic risk</b>          |                                      |                                          |                                          |                                          |                                          |
| High (N=7111)                    | 67/36 345                            | 1[Reference]                             | 1[Reference]                             | 1[Reference]                             | 1[Reference]                             |
| Intermediate (N=7658)            | 97/39 072                            | 1.34 (1.00, 1.79); 0.047                 | 1.35 (1.01, 1.80); 0.046                 | 1.31 (0.98, 1.76); 0.07                  | 1.31 (0.98, 1.75); 0.07                  |
| Low (N=6457)                     | 127/32 628                           | 1.71 (1.30, 2.25); <0.001                | 1.71 (1.30, 2.25); <0.001                | 1.54 (1.17, 2.03); 0.002                 | 1.52 (1.15, 2.01); 0.003 <sup>a</sup>    |
| <b>Intermediate genetic risk</b> |                                      |                                          |                                          |                                          |                                          |
| High (N=6962)                    | 98/35 588                            | 1.52 (1.14, 2.04); 0.004                 | 1.53 (1.14, 2.04); 0.004                 | 1.54 (1.15, 2.06); 0.004                 | 1.54 (1.15, 2.05); 0.004 <sup>a</sup>    |
| Intermediate (N=7642)            | 124/39 034                           | 1.79 (1.36, 2.36); <0.001                | 1.79 (1.36, 2.36); <0.001                | 1.76 (1.33, 2.31); <0.001                | 1.76 (1.33, 2.31); <0.001 <sup>a</sup>   |
| Low (N=6415)                     | 164/32 271                           | 2.32 (1.78, 3.02); <0.001                | 2.31 (1.77, 3.01); <0.001                | 2.05 (1.57, 2.67); <0.001                | 2.03 (1.55, 2.64); <0.001 <sup>a</sup>   |
| <b>High genetic risk</b>         |                                      |                                          |                                          |                                          |                                          |
| High (N=7001)                    | 171/35 758                           | 2.84 (2.19, 3.69); <0.001                | 2.84 (2.19, 3.69); <0.001                | 2.85 (2.20, 3.70); <0.001                | 2.85 (2.20, 3.70); <0.001 <sup>a</sup>   |
| Intermediate (N=7272)            | 232/36 863                           | 3.62 (2.81, 4.66); <0.001                | 3.62 (2.81, 4.67); <0.001                | 3.56 (2.76, 4.58); <0.001                | 3.55 (2.76, 4.57); <0.001 <sup>a</sup>   |
| Low (N=6155)                     | 279/30 904                           | 4.20 (3.27, 5.38); <0.001                | 4.20 (3.27, 5.38); <0.001                | 3.79 (2.95, 4.87); <0.001                | 3.74 (2.92, 4.81); <0.001 <sup>a</sup>   |
| <i>P value for trend</i>         |                                      | <i>P</i> <0.001                          | <i>P</i> <0.001                          | <i>P</i> <0.001                          | <i>P</i> <0.001                          |
| <b>Acrophase</b>                 |                                      |                                          |                                          |                                          |                                          |
| <b>Low genetic risk</b>          |                                      |                                          |                                          |                                          |                                          |
| Advanced (N=4373)                | 81/22 142                            | 1[Reference]                             | 1[Reference]                             | 1[Reference]                             | 1[Reference]                             |
| Intermediate (N=6813)            | 90/34 521                            | 0.94 (0.71, 1.24); 0.66                  | 0.96 (0.72, 1.26); 0.75                  | 0.97 (0.73, 1.28); 0.82                  | 0.98 (0.74, 1.29); 0.86                  |
| Delayed (N=10 040)               | 120/51 382                           | 0.94 (0.72, 1.22); 0.64                  | 0.96 (0.74, 1.25); 0.77                  | 0.97 (0.74, 1.26); 0.79                  | 0.97 (0.75, 1.27); 0.84                  |
| <b>Intermediate genetic risk</b> |                                      |                                          |                                          |                                          |                                          |

|                                  |            |                           |                           |                           |                                        |
|----------------------------------|------------|---------------------------|---------------------------|---------------------------|----------------------------------------|
| Advanced (N=4277)                | 78/21 679  | 1.04 (0.78, 1.39); 0.77   | 1.05 (0.79, 1.40); 0.75   | 1.05 (0.79, 1.40); 0.73   | 1.05 (0.79, 1.40); 0.75                |
| Intermediate (N=6590)            | 126/33 458 | 1.36 (1.05, 1.76); 0.02   | 1.39 (1.07, 1.80); 0.01   | 1.41 (1.09, 1.82); 0.01   | 1.42 (1.09, 1.84); 0.008 <sup>a</sup>  |
| Delayed (N=10 152)               | 182/51 756 | 1.47 (1.15, 1.87); 0.002  | 1.50 (1.17, 1.91); 0.001  | 1.49 (1.17, 1.90); 0.001  | 1.50 (1.18, 1.92); 0.001 <sup>a</sup>  |
| <b>High genetic risk</b>         |            |                           |                           |                           |                                        |
| Advanced (N=4032)                | 139/20 334 | 2.13 (1.66, 2.74); <0.001 | 2.15 (1.67, 2.76); <0.001 | 2.17 (1.69, 2.80); <0.001 | 2.17 (1.69, 2.79); <0.001 <sup>a</sup> |
| Intermediate (N=6540)            | 234/33 128 | 2.64 (2.08, 3.33); <0.001 | 2.68 (2.12, 3.39); <0.001 | 2.74 (2.16, 3.46); <0.001 | 2.76 (2.18, 3.49); <0.001 <sup>a</sup> |
| Delayed (N=9856)                 | 309/50 063 | 2.61 (2.08, 3.28); <0.001 | 2.66 (2.12, 3.34); <0.001 | 2.67 (2.12, 3.35); <0.001 | 2.69 (2.14, 3.38); <0.001 <sup>a</sup> |
| <i>P value for trend</i>         |            | <i>P &lt;0.001</i>        | <i>P &lt;0.001</i>        | <i>P &lt;0.001</i>        | <i>P &lt;0.001</i>                     |
| <b>F-Pseudo</b>                  |            |                           |                           |                           |                                        |
| <b>Low genetic risk</b>          |            |                           |                           |                           |                                        |
| High (N=5019)                    | 68/25 650  | 1[Reference]              | 1[Reference]              | 1[Reference]              | 1[Reference]                           |
| Intermediate (N=7074)            | 96/35 997  | 1.03 (0.77, 1.38); 0.83   | 1.03 (0.77, 1.38); 0.85   | 1.03 (0.77, 1.38); 0.86   | 1.02 (0.77, 1.37); 0.87                |
| Low (N=9133)                     | 127/46 398 | 1.10 (0.84, 1.46); 0.49   | 1.11 (0.84, 1.46); 0.47   | 1.09 (0.82, 1.43); 0.56   | 1.08 (0.82, 1.42); 0.60                |
| <b>Intermediate genetic risk</b> |            |                           |                           |                           |                                        |
| High (N=5060)                    | 90/25 836  | 1.50 (1.12, 2.01); 0.006  | 1.51 (1.13, 2.02); 0.006  | 1.52 (1.13, 2.04); 0.005  | 1.52 (1.14, 2.04); 0.005 <sup>a</sup>  |
| Intermediate (N=6933)            | 120/35 291 | 1.39 (1.05, 1.83); 0.02   | 1.39 (1.05, 1.83); 0.02   | 1.37 (1.04, 1.81); 0.03   | 1.37 (1.04, 1.81); 0.03 <sup>a</sup>   |
| Low (N=9026)                     | 176/45 766 | 1.50 (1.15, 1.96); 0.003  | 1.50 (1.15, 1.95); 0.003  | 1.46 (1.12, 1.91); 0.005  | 1.45 (1.11, 1.90); 0.006 <sup>a</sup>  |
| <b>High genetic risk</b>         |            |                           |                           |                           |                                        |
| High (N=4871)                    | 153/24 913 | 2.64 (2.01, 3.45); <0.001 | 2.62 (2.00, 3.43); <0.001 | 2.67 (2.04, 3.50); <0.001 | 2.68 (2.05, 3.51); <0.001 <sup>a</sup> |
| Intermediate (N=6789)            | 232/34 275 | 2.72 (2.11, 3.51); <0.001 | 2.74 (2.13, 3.54); <0.001 | 2.73 (2.11, 3.52); <0.001 | 2.72 (2.11, 3.51); <0.001 <sup>a</sup> |
| Low (N=8768)                     | 297/44 338 | 2.86 (2.23, 3.66); <0.001 | 2.84 (2.22, 3.65); <0.001 | 2.80 (2.18, 3.59); <0.001 | 2.78 (2.16, 3.56); <0.001 <sup>a</sup> |
| <i>P value for trend</i>         |            | <i>P &lt;0.001</i>        | <i>P &lt;0.001</i>        | <i>P &lt;0.001</i>        | <i>P &lt;0.001</i>                     |
| <b>Mesor</b>                     |            |                           |                           |                           |                                        |
| <b>Low genetic risk</b>          |            |                           |                           |                           |                                        |

|                                  |            |                           |                           |                           |                                        |
|----------------------------------|------------|---------------------------|---------------------------|---------------------------|----------------------------------------|
| High (N=8017)                    | 82/40 959  | 1[Reference]              | 1[Reference]              | 1[Reference]              | 1[Reference]                           |
| Intermediate (N=6650)            | 96/33 887  | 1.44 (1.09, 1.90); 0.009  | 1.45 (1.10, 1.91); 0.009  | 1.41 (1.07, 1.85); 0.02   | 1.40 (1.07, 1.85); 0.02 <sup>a</sup>   |
| Low (N=6559)                     | 113/33 198 | 1.62 (1.24, 2.11); <0.001 | 1.62 (1.25, 2.11); <0.001 | 1.46 (1.12, 1.91); 0.005  | 1.46 (1.12, 1.91); 0.005 <sup>a</sup>  |
| <b>Intermediate genetic risk</b> |            |                           |                           |                           |                                        |
| High (N=7863)                    | 115/40 141 | 1.42 (1.09, 1.86); 0.01   | 1.42 (1.09, 1.86); 0.01   | 1.44 (1.10, 1.88); 0.008  | 1.44 (1.10, 1.88); 0.008 <sup>a</sup>  |
| Intermediate (N=6677)            | 127/34 057 | 2.09 (1.61, 2.70); <0.001 | 2.09 (1.62, 2.71); <0.001 | 2.02 (1.56, 2.61); <0.001 | 2.02 (1.56, 2.61); <0.001 <sup>a</sup> |
| Low (N=6479)                     | 144/32 695 | 2.13 (1.65, 2.74); <0.001 | 2.12 (1.65, 2.72); <0.001 | 1.89 (1.47, 2.44); <0.001 | 1.89 (1.47, 2.44); <0.001 <sup>a</sup> |
| <b>High genetic risk</b>         |            |                           |                           |                           |                                        |
| High (N=7811)                    | 208/39 834 | 2.86 (2.25, 3.63); <0.001 | 2.87 (2.26, 3.64); <0.001 | 2.89 (2.27, 3.66); <0.001 | 2.89 (2.28, 3.67); <0.001 <sup>a</sup> |
| Intermediate (N=6346)            | 210/32 206 | 3.55 (2.79, 4.50); <0.001 | 3.54 (2.79, 4.50); <0.001 | 3.46 (2.72, 4.39); <0.001 | 3.45 (2.72, 4.39); <0.001 <sup>a</sup> |
| Low (N=6271)                     | 264/31 485 | 4.19 (3.33, 5.28); <0.001 | 4.19 (3.33, 5.29); <0.001 | 3.79 (3.00, 4.78); <0.001 | 3.79 (3.00, 4.78); <0.001 <sup>a</sup> |
| <i>P value for trend</i>         |            | <i>P &lt;0.001</i>        | <i>P &lt;0.001</i>        | <i>P &lt;0.001</i>        | <i>P &lt;0.001</i>                     |

Abbreviation: AF, atrial fibrillation; BMI, body mass index; CI, confidence interval; FDR, false-discovery rate; HR, hazard ratio.

Analyses were conducted using Cox proportional hazard models. **Model 1** was adjusted for age, sex, and first 10 principal components of ancestry. **Model 2** was adjusted as in model 1 and for Townsend deprivation index, recruitment centre, education level, and season of accelerometer wear. **Model 3** was adjusted as in model 2 and for BMI categories, healthy diet score, smoking status, alcohol intake, coffee consumption, tea consumption, hypertension, diabetes, and dyslipidemia. **Model 4** was adjusted as in model 3 and for sleep efficiency and sleep duration. Participants with prevalent AF were excluded. <sup>a</sup> P values remained significant after multiple testing with FDR method.

**Supplementary Table 9. Sensitivity analysis on the associations of circadian rest-activity characteristics and genetic risk with atrial fibrillation by excluding those reporting a history of shift work**

| <b>Subgroup</b>                  | <b>No. of AF cases/ person-years</b> | <b>Model 1<br/>HR (95% CI); <i>P</i></b> | <b>Model 2<br/>HR (95% CI); <i>P</i></b> | <b>Model 3<br/>HR (95% CI); <i>P</i></b> | <b>Model 4<br/>HR (95% CI); <i>P</i></b> |
|----------------------------------|--------------------------------------|------------------------------------------|------------------------------------------|------------------------------------------|------------------------------------------|
| <b>Amplitude</b>                 |                                      |                                          |                                          |                                          |                                          |
| <b>Low genetic risk</b>          |                                      |                                          |                                          |                                          |                                          |
| High (N=5471)                    | 69/33 474                            | 1[Reference]                             | 1[Reference]                             | 1[Reference]                             | 1[Reference]                             |
| Intermediate (N=6021)            | 108/36 729                           | 1.40 (1.03, 1.89); 0.03                  | 1.40 (1.04, 1.90); 0.03                  | 1.36 (1.01, 1.84); 0.046                 | 1.36 (1.00, 1.84); 0.048 <sup>a</sup>    |
| Low (N=5150)                     | 150/30 943                           | 1.86 (1.40, 2.48); <0.001                | 1.85 (1.39, 2.47); <0.001                | 1.66 (1.25, 2.22); <0.001                | 1.65 (1.24, 2.19); <0.001 <sup>a</sup>   |
| <b>Intermediate genetic risk</b> |                                      |                                          |                                          |                                          |                                          |
| High (N=5333)                    | 109/32 661                           | 1.64 (1.22, 2.22); 0.001                 | 1.65 (1.22, 2.23); 0.001                 | 1.65 (1.22, 2.23); 0.001                 | 1.65 (1.22, 2.23); 0.001 <sup>a</sup>    |
| Intermediate (N=6034)            | 155/36 798                           | 2.01 (1.51, 2.66); <0.001                | 2.00 (1.51, 2.66); <0.001                | 1.96 (1.47, 2.60); <0.001                | 1.96 (1.48, 2.61); <0.001 <sup>a</sup>   |
| Low (N=5089)                     | 200/30 430                           | 2.58 (1.96, 3.40); <0.001                | 2.56 (1.94, 3.37); <0.001                | 2.26 (1.71, 2.97); <0.001                | 2.24 (1.70, 2.95); <0.001 <sup>a</sup>   |
| <b>High genetic risk</b>         |                                      |                                          |                                          |                                          |                                          |
| High (N=5392)                    | 181/32 811                           | 2.72 (2.06, 3.59); <0.001                | 2.71 (2.05, 3.58); <0.001                | 2.71 (2.06, 3.58); <0.001                | 2.71 (2.06, 3.58); <0.001 <sup>a</sup>   |
| Intermediate (N=5840)            | 242/35 241                           | 3.37 (2.58, 4.40); <0.001                | 3.37 (2.58, 4.40); <0.001                | 3.31 (2.53, 4.33); <0.001                | 3.30 (2.53, 4.32); <0.001 <sup>a</sup>   |
| Low (N=4881)                     | 316/28 887                           | 4.44 (3.42, 5.76); <0.001                | 4.42 (3.40, 5.73); <0.001                | 3.97 (3.05, 5.16); <0.001                | 3.93 (3.02, 5.11); <0.001 <sup>a</sup>   |
| <i>P value for trend</i>         |                                      | <i>P</i> <0.001                          | <i>P</i> <0.001                          | <i>P</i> <0.001                          | <i>P</i> <0.001                          |
| <b>Acrophase</b>                 |                                      |                                          |                                          |                                          |                                          |
| <b>Low genetic risk</b>          |                                      |                                          |                                          |                                          |                                          |
| Advanced (N=3369)                | 88/20 331                            | 1[Reference]                             | 1[Reference]                             | 1[Reference]                             | 1[Reference]                             |
| Intermediate (N=5379)            | 109/32 553                           | 0.97 (0.73, 1.28); 0.81                  | 0.98 (0.74, 1.30); 0.88                  | 1.00 (0.76, 1.33); >0.99                 | 1.01 (0.76, 1.34); 0.96                  |
| Delayed (N=7894)                 | 130/48 282                           | 0.89 (0.68, 1.17); 0.42                  | 0.91 (0.69, 1.19); 0.48                  | 0.92 (0.70, 1.21); 0.54                  | 0.93 (0.70, 1.21); 0.57                  |
| <b>Intermediate genetic risk</b> |                                      |                                          |                                          |                                          |                                          |

|                                  |            |                           |                           |                           |                                        |
|----------------------------------|------------|---------------------------|---------------------------|---------------------------|----------------------------------------|
| Advanced (N=3300)                | 91/19 994  | 1.07 (0.80, 1.43); 0.65   | 1.07 (0.80, 1.43); 0.66   | 1.07 (0.80, 1.43); 0.65   | 1.07 (0.80, 1.43); 0.65                |
| Intermediate (N=5176)            | 150/31 357 | 1.40 (1.07, 1.82); 0.01   | 1.42 (1.09, 1.84); 0.01   | 1.45 (1.11, 1.89); 0.006  | 1.46 (1.12, 1.90); 0.005 <sup>a</sup>  |
| Delayed (N=7980)                 | 223/48 539 | 1.54 (1.20, 1.97); <0.001 | 1.55 (1.21, 1.99); <0.001 | 1.56 (1.22, 2.00); <0.001 | 1.58 (1.23, 2.02); <0.001 <sup>a</sup> |
| <b>High genetic risk</b>         |            |                           |                           |                           |                                        |
| Advanced (N=3103)                | 152/18 549 | 1.96 (1.51, 2.55); <0.001 | 1.97 (1.51, 2.56); <0.001 | 2.00 (1.54, 2.60); <0.001 | 1.99 (1.53, 2.59); <0.001 <sup>a</sup> |
| Intermediate (N=5265)            | 256/31 664 | 2.46 (1.93, 3.14); <0.001 | 2.50 (1.96, 3.18); <0.001 | 2.58 (2.02, 3.29); <0.001 | 2.60 (2.04, 3.32); <0.001 <sup>a</sup> |
| Delayed (N=7745)                 | 331/46 756 | 2.40 (1.89, 3.04); <0.001 | 2.42 (1.91, 3.07); <0.001 | 2.45 (1.93, 3.10); <0.001 | 2.47 (1.95, 3.12); <0.001 <sup>a</sup> |
| <i>P value for trend</i>         |            | <i>P &lt;0.001</i>        | <i>P &lt;0.001</i>        | <i>P &lt;0.001</i>        | <i>P &lt;0.001</i>                     |
| <b>F-Pseudo</b>                  |            |                           |                           |                           |                                        |
| <b>Low genetic risk</b>          |            |                           |                           |                           |                                        |
| High (N=4036)                    | 72/24 626  | 1[Reference]              | 1[Reference]              | 1[Reference]              | 1[Reference]                           |
| Intermediate (N=5615)            | 108/34 119 | 1.02 (0.76, 1.38); 0.88   | 1.02 (0.76, 1.37); 0.90   | 1.02 (0.76, 1.37); 0.91   | 1.02 (0.76, 1.37); 0.91                |
| Low (N=6991)                     | 147/42 402 | 1.17 (0.88, 1.55); 0.27   | 1.18 (0.89, 1.56); 0.26   | 1.15 (0.87, 1.53); 0.32   | 1.15 (0.86, 1.52); 0.34                |
| <b>Intermediate genetic risk</b> |            |                           |                           |                           |                                        |
| High (N=4031)                    | 111/24 594 | 1.55 (1.15, 2.08); 0.004  | 1.55 (1.16, 2.09); 0.004  | 1.56 (1.16, 2.10); 0.003  | 1.56 (1.16, 2.10); 0.003 <sup>a</sup>  |
| Intermediate (N=5559)            | 153/33 753 | 1.50 (1.14, 1.99); 0.004  | 1.50 (1.13, 1.99); 0.005  | 1.49 (1.13, 1.97); 0.005  | 1.49 (1.13, 1.98); 0.005 <sup>a</sup>  |
| Low (N=6866)                     | 200/41 542 | 1.64 (1.25, 2.15); <0.001 | 1.63 (1.24, 2.13); <0.001 | 1.60 (1.22, 2.09); 0.001  | 1.59 (1.21, 2.08); 0.001 <sup>a</sup>  |
| <b>High genetic risk</b>         |            |                           |                           |                           |                                        |
| High (N=3925)                    | 175/23 808 | 2.66 (2.02, 3.50); <0.001 | 2.64 (2.01, 3.48); <0.001 | 2.70 (2.05, 3.55); <0.001 | 2.70 (2.05, 3.55); <0.001 <sup>a</sup> |
| Intermediate (N=5464)            | 248/32 762 | 2.55 (1.96, 3.31); <0.001 | 2.56 (1.97, 3.32); <0.001 | 2.55 (1.96, 3.31); <0.001 | 2.54 (1.96, 3.31); <0.001 <sup>a</sup> |
| Low (N=6724)                     | 316/40 369 | 2.71 (2.10, 3.50); <0.001 | 2.70 (2.09, 3.49); <0.001 | 2.67 (2.07, 3.45); <0.001 | 2.66 (2.06, 3.44); <0.001 <sup>a</sup> |
| <i>P value for trend</i>         |            | <i>P &lt;0.001</i>        | <i>P &lt;0.001</i>        | <i>P &lt;0.001</i>        | <i>P &lt;0.001</i>                     |
| <b>Mesor</b>                     |            |                           |                           |                           |                                        |
| <b>Low genetic risk</b>          |            |                           |                           |                           |                                        |

|                                  |            |                           |                           |                           |                                        |
|----------------------------------|------------|---------------------------|---------------------------|---------------------------|----------------------------------------|
| High (N=6199)                    | 90/37 871  | 1[Reference]              | 1[Reference]              | 1[Reference]              | 1[Reference]                           |
| Intermediate (N=5222)            | 102/31 796 | 1.34 (1.01, 1.78); 0.04   | 1.34 (1.01, 1.78); 0.04   | 1.29 (.97, 1.72); 0.08    | 1.29 (.97, 1.71); 0.08                 |
| Low (N=5221)                     | 135/31 480 | 1.63 (1.25, 2.12); <0.001 | 1.62 (1.24, 2.12); <0.001 | 1.47 (1.12, 1.92); 0.005  | 1.47(1.12, 1.92); 0.005 <sup>a</sup>   |
| <b>Intermediate genetic risk</b> |            |                           |                           |                           |                                        |
| High (N=6068)                    | 129/37 104 | 1.47 (1.13, 1.93); 0.005  | 1.48 (1.13, 1.93); 0.005  | 1.49 (1.14, 1.95); 0.004  | 1.49 (1.14, 1.95); 0.004 <sup>a</sup>  |
| Intermediate (N=5274)            | 156/32 058 | 2.10 (1.62, 2.72); <0.001 | 2.10 (1.62, 2.72); <0.001 | 2.02 (1.56, 2.62); <0.001 | 2.03 (1.56, 2.63); <0.001 <sup>a</sup> |
| Low (N=5114)                     | 179/30 727 | 2.21 (1.72, 2.85); <0.001 | 2.19 (1.70, 2.82); <0.001 | 1.95 (1.51, 2.52); <0.001 | 1.96 (1.52, 2.53); <0.001 <sup>a</sup> |
| <b>High genetic risk</b>         |            |                           |                           |                           |                                        |
| High (N=6076)                    | 216/36 961 | 2.53 (1.98, 3.24); <0.001 | 2.54 (1.98, 3.24); <0.001 | 2.55 (1.99, 3.26); <0.001 | 2.55 (1.99, 3.26); <0.001 <sup>a</sup> |
| Intermediate (N=5056)            | 219/30 489 | 3.10 (2.42, 3.96); <0.001 | 3.10 (2.42, 3.96); <0.001 | 3.02 (2.37, 3.87); <0.001 | 3.03 (2.37, 3.87); <0.001 <sup>a</sup> |
| Low (N=4981)                     | 304/29 489 | 4.09 (3.23, 5.17); <0.001 | 4.07 (3.21, 5.15); <0.001 | 3.66 (2.89, 4.64); <0.001 | 3.68 (2.90, 4.66); <0.001 <sup>a</sup> |
| <i>P value for trend</i>         |            | <i>P &lt;0.001</i>        | <i>P &lt;0.001</i>        | <i>P &lt;0.001</i>        | <i>P &lt;0.001</i>                     |

Abbreviation: AF, atrial fibrillation; BMI, body mass index; CI, confidence interval; FDR, false-discovery rate; HR, hazard ratio.

Analyses were conducted using Cox proportional hazard models. **Model 1** was adjusted for age, sex, and first 10 principal components of ancestry. **Model 2** was adjusted as in model 1 and for Townsend deprivation index, recruitment centre, education level, and season of accelerometer wear. **Model 3** was adjusted as in model 2 and for BMI categories, healthy diet score, smoking status, alcohol intake, coffee consumption, tea consumption, hypertension, diabetes, and dyslipidemia. **Model 4** was adjusted as in model 3 and for sleep efficiency and sleep duration. Participants with prevalent AF were excluded. <sup>a</sup>P values remained significant after multiple testing with FDR method.



**Supplementary Table 10. Risk of Incident atrial fibrillation according to circadian rest-activity characteristics within each genetic risk category**

| <b>Subgroup</b>                  | <b>No. of AF cases/ person-years</b> | <b>Model 1</b><br>HR (95% CI); <i>P</i> | <b>Model 2</b><br>HR (95% CI); <i>P</i> | <b>Model 3</b><br>HR (95% CI); <i>P</i> | <b>Model 4</b><br>HR (95% CI); <i>P</i> | <b>P for interaction</b> |
|----------------------------------|--------------------------------------|-----------------------------------------|-----------------------------------------|-----------------------------------------|-----------------------------------------|--------------------------|
| <b>Amplitude</b>                 |                                      |                                         |                                         |                                         |                                         | 0.76                     |
| <b>Low genetic risk</b>          |                                      |                                         |                                         |                                         |                                         |                          |
| High (N=7121)                    | 89/43 571                            | 1[Reference]                            | 1[Reference]                            | 1[Reference]                            | 1[Reference]                            |                          |
| Intermediate (N=7673)            | 134/46 802                           | 1.34 (1.03, 1.76); 0.03                 | 1.35 (1.03, 1.77); 0.03                 | 1.31 (1.00, 1.71); 0.05                 | 1.30 (1.00, 1.71); 0.05                 |                          |
| Low (N=6480)                     | 187/38 993                           | 1.76 (1.36, 2.26); <0.001               | 1.76 (1.36, 2.27); <0.001               | 1.54 (1.19, 2.00); 0.001                | 1.52 (1.17, 1.97); 0.002 <sup>a</sup>   |                          |
| <i>P value for trend</i>         |                                      | <i>P</i> <0.001                         | <i>P</i> <0.001                         | <i>P</i> =0.001                         | <i>P</i> =0.002                         |                          |
| <b>Intermediate genetic risk</b> |                                      |                                         |                                         |                                         |                                         |                          |
| High (N=6976)                    | 134/42 643                           | 1[Reference]                            | 1[Reference]                            | 1[Reference]                            | 1[Reference]                            |                          |
| Intermediate (N=7667)            | 183/46 750                           | 1.20 (0.96, 1.50); 0.12                 | 1.20 (0.96, 1.50); 0.12                 | 1.16 (0.93, 1.46); 0.18                 | 1.17 (0.94, 1.47); 0.17                 |                          |
| Low (N=6448)                     | 244/38 578                           | 1.57 (1.26, 1.94); <0.001               | 1.57 (1.26, 1.94); <0.001               | 1.39 (1.12, 1.73); 0.003                | 1.38 (1.11, 1.72); 0.004 <sup>a</sup>   |                          |
| <i>P value for trend</i>         |                                      | <i>P</i> <0.001                         | <i>P</i> <0.001                         | <i>P</i> =0.003                         | <i>P</i> =0.004                         |                          |
| <b>High genetic risk</b>         |                                      |                                         |                                         |                                         |                                         |                          |
| High (N=7040)                    | 243/42 780                           | 1[Reference]                            | 1[Reference]                            | 1[Reference]                            | 1[Reference]                            |                          |
| Intermediate (N=7316)            | 313/44 078                           | 1.26 (1.06, 1.49); 0.008                | 1.26 (1.06, 1.49); 0.008                | 1.23 (1.04, 1.45); 0.02                 | 1.23 (1.04, 1.45); 0.02 <sup>a</sup>    |                          |
| Low (N=6206)                     | 393/36 816                           | 1.56 (1.33, 1.83); <0.001               | 1.55 (1.32, 1.82); <0.001               | 1.39 (1.18, 1.64); <0.001               | 1.39 (1.18, 1.64); <0.001 <sup>a</sup>  |                          |
| <i>P value for trend</i>         |                                      | <i>P</i> <0.001                         | <i>P</i> <0.001                         | <i>P</i> <0.001                         | <i>P</i> <0.001                         |                          |
| <b>Acrophase</b>                 |                                      |                                         |                                         |                                         |                                         | 0.30                     |
| <b>Low genetic risk</b>          |                                      |                                         |                                         |                                         |                                         |                          |
| Advanced (N=4386)                | 109/26 489                           | 1[Reference]                            | 1[Reference]                            | 1[Reference]                            | 1[Reference]                            |                          |
| Intermediate (N=6830)            | 133/41 374                           | 1.01 (0.78, 1.30); 0.97                 | 1.00 (0.78, 1.30); 0.97                 | 1.02 (0.79, 1.32); 0.87                 | 1.03 (0.80, 1.33); 0.82                 |                          |

|                                  |            |                          |                          |                          |                                       |
|----------------------------------|------------|--------------------------|--------------------------|--------------------------|---------------------------------------|
| Delayed (N=10 058)               | 168/61 503 | 1.01 (0.79, 1.29); 0.92  | 1.01 (0.79, 1.30); 0.91  | 1.02 (0.80, 1.31); 0.87  | 1.03 (0.81, 1.32); 0.79               |
| <i>P value for trend</i>         |            | P=0.92                   | P=0.91                   | P=0.88                   | P=0.80                                |
| <b>Intermediate genetic risk</b> |            |                          |                          |                          |                                       |
| Advanced (N=4291)                | 113/25 949 | 1[Reference]             | 1[Reference]             | 1[Reference]             | 1[Reference]                          |
| Intermediate (N=6613)            | 180/40 071 | 1.28 (1.01, 1.62); 0.04  | 1.29 (1.02, 1.63); 0.04  | 1.30 (1.02, 1.64); 0.03  | 1.31 (1.03, 1.66); 0.03 <sup>a</sup>  |
| Delayed (N=10 187)               | 268/61 950 | 1.41 (1.13, 1.76); 0.002 | 1.43 (1.14, 1.79); 0.002 | 1.41 (1.13, 1.76); 0.003 | 1.43 (1.14, 1.79); 0.002 <sup>a</sup> |
| <i>P value for trend</i>         |            | P=0.003                  | P=0.002                  | P=0.004                  | P=0.003                               |
| <b>High genetic risk</b>         |            |                          |                          |                          |                                       |
| Advanced (N=4066)                | 199/24 289 | 1[Reference]             | 1[Reference]             | 1[Reference]             | 1[Reference]                          |
| Intermediate (N=6583)            | 322/39 582 | 1.24 (1.04, 1.48); 0.02  | 1.27 (1.06, 1.52); 0.009 | 1.28 (1.07, 1.53); 0.007 | 1.29 (1.08, 1.54); 0.006 <sup>a</sup> |
| Delayed (N=9913)                 | 428/59 802 | 1.22 (1.03, 1.45); 0.02  | 1.24 (1.05, 1.47); 0.01  | 1.23 (1.04, 1.46); 0.02  | 1.24 (1.04, 1.47); 0.02 <sup>a</sup>  |
| <i>P value for trend</i>         |            | P=0.04                   | P=0.03                   | P=0.04                   | P=0.04                                |
| <b>F-Pseudo</b>                  |            |                          |                          |                          | 0.80                                  |
| <b>Low genetic risk</b>          |            |                          |                          |                          |                                       |
| High (N=5026)                    | 96/30 676  | 1[Reference]             | 1[Reference]             | 1[Reference]             | 1[Reference]                          |
| Intermediate (N=7092)            | 141/43 111 | 1.00 (0.77, 1.29); 0.97  | 0.99 (0.76, 1.29); 0.95  | 0.99 (0.76, 1.29); 0.95  | 0.99 (0.76, 1.29); 0.94               |
| Low (N=9156)                     | 173/55 579 | 1.03 (0.80, 1.32); 0.84  | 1.03 (0.80, 1.32); 0.84  | 1.01 (0.78, 1.29); 0.97  | 1.00 (0.77, 1.28); 0.98               |
| <i>P value for trend</i>         |            | P=0.81                   | P=0.82                   | P=0.96                   | P=0.99                                |
| <b>Intermediate genetic risk</b> |            |                          |                          |                          |                                       |
| High (N=5082)                    | 136/30 905 | 1[Reference]             | 1[Reference]             | 1[Reference]             | 1[Reference]                          |
| Intermediate (N=6959)            | 181/42 269 | 0.94 (0.76, 1.18); 0.61  | 0.94 (0.75, 1.17); 0.56  | 0.92 (0.74, 1.15); 0.46  | 0.92 (0.74, 1.15); 0.46               |
| Low (N=9050)                     | 244/54 797 | 1.01 (0.82, 1.25); 0.92  | 1.00 (0.81, 1.24); 0.98  | 0.97 (0.78, 1.20); 0.76  | 0.96 (0.78, 1.19); 0.70               |
| <i>P value for trend</i>         |            | P=0.83                   | P=0.88                   | P=0.86                   | P=0.79                                |
| <b>High genetic risk</b>         |            |                          |                          |                          |                                       |

|                                  |            |                           |                           |                           |                                        |
|----------------------------------|------------|---------------------------|---------------------------|---------------------------|----------------------------------------|
| High (N=4899)                    | 207/29 725 | 1[Reference]              | 1[Reference]              | 1[Reference]              | 1[Reference]                           |
| Intermediate (N=6833)            | 323/40 972 | 1.05 (0.88, 1.25); 0.56   | 1.07 (0.90, 1.28); 0.45   | 1.04 (0.88, 1.24); 0.64   | 1.04 (0.88, 1.24); 0.64                |
| Low (N=8830)                     | 419/52 976 | 1.10 (0.93, 1.30); 0.28   | 1.10 (0.93, 1.30); 0.28   | 1.06 (0.89, 1.25); 0.52   | 1.05 (0.89, 1.25); 0.54                |
| <i>P value for trend</i>         |            | P=0.28                    | P=0.30                    | P=0.53                    | P=0.56                                 |
| <b>Mesor</b>                     |            |                           |                           |                           |                                        |
| <b>Low genetic risk</b>          |            |                           |                           |                           |                                        |
| High (N=8028)                    | 112/49 093 | 1[Reference]              | 1[Reference]              | 1[Reference]              | 1[Reference]                           |
| Intermediate (N=6664)            | 125/40 575 | 1.34 (1.03, 1.73); 0.03   | 1.35 (1.04, 1.74); 0.02   | 1.30 (1.00, 1.68); 0.047  | 1.30 (1.00, 1.68); 0.047 <sup>a</sup>  |
| Low (N=6582)                     | 173/39 698 | 1.66 (1.31, 2.11); <0.001 | 1.66 (1.31, 2.11); <0.001 | 1.46 (1.14, 1.86); 0.002  | 1.45 (1.14, 1.86); 0.003 <sup>a</sup>  |
| <i>P value for trend</i>         |            | <i>P</i> <0.001           | <i>P</i> <0.001           | P=0.003                   | P=0.003                                |
| <b>Intermediate genetic risk</b> |            |                           |                           |                           |                                        |
| High (N=7875)                    | 156/48 094 | 1[Reference]              | 1[Reference]              | 1[Reference]              | 1[Reference]                           |
| Intermediate (N=6707)            | 189/40 769 | 1.44 (1.16, 1.78); <0.001 | 1.44 (1.16, 1.78); <0.001 | 1.38 (1.11, 1.70); 0.003  | 1.38 (1.12, 1.71); 0.003 <sup>a</sup>  |
| Low (N=6509)                     | 216/39 107 | 1.50 (1.22, 1.84); <0.001 | 1.50 (1.22, 1.84); <0.001 | 1.33 (1.07, 1.64); 0.009  | 1.33 (1.07, 1.64); 0.009 <sup>a</sup>  |
| <i>P value for trend</i>         |            | <i>P</i> <0.001           | <i>P</i> <0.001           | P=0.012                   | P=0.011                                |
| <b>High genetic risk</b>         |            |                           |                           |                           |                                        |
| High (N=7852)                    | 290/47 649 | 1[Reference]              | 1[Reference]              | 1[Reference]              | 1[Reference]                           |
| Intermediate (N=6385)            | 287/38 474 | 1.23 (1.05, 1.45); 0.01   | 1.23 (1.04, 1.45); 0.01   | 1.19 (1.01, 1.40); 0.04   | 1.19 (1.01, 1.40); 0.04 <sup>a</sup>   |
| Low (N=6325)                     | 372/37 551 | 1.49 (1.28, 1.74); <0.001 | 1.48 (1.27, 1.73); <0.001 | 1.33 (1.13, 1.55); <0.001 | 1.33 (1.14, 1.56); <0.001 <sup>a</sup> |
| <i>P value for trend</i>         |            | <i>P</i> <0.001           | <i>P</i> <0.001           | <i>P</i> <0.001           | <i>P</i> <0.001                        |

Abbreviation: AF, atrial fibrillation; BMI, body mass index; CI, confidence interval; FDR, false-discovery rate; HR, hazard ratio.

Analyses were conducted using Cox proportional hazard models. **Model 1** was adjusted for age, sex, and first 10 principal components of ancestry. **Model 2** was adjusted as in model 1 and for Townsend deprivation index, recruitment centre, education level, and season of accelerometer wear. **Model 3** was adjusted as in model 2 and for BMI categories, healthy diet score, smoking status, alcohol intake, coffee consumption, tea consumption, hypertension, diabetes, and dyslipidemia. **Model 4** was adjusted as in model 3 and for sleep efficiency and sleep duration. Participants with prevalent AF were excluded. <sup>a</sup> P values remained significant after multiple testing with FDR method.

**Supplementary Table 11. Single-nucleotide polymorphisms used to build the genetic risk score for atrial fibrillation**

| Rs ID       | Position       | Risk/reference allele | Effect (beta) | StdErr | P-value   |
|-------------|----------------|-----------------------|---------------|--------|-----------|
| rs284277    | chr1:10790797  | C/A                   | 0.0422        | 0.0069 | 1.245e-09 |
| rs7529220   | chr1:22282619  | C/T                   | 0.0621        | 0.0098 | 1.983e-10 |
| rs2885697   | chr1:41544279  | G/T                   | 0.0439        | 0.007  | 2.884e-10 |
| rs11590635  | chr1:49309764  | A/G                   | 0.1456        | 0.0248 | 4.123e-09 |
| rs146518726 | chr1:51535039  | A/G                   | 0.1605        | 0.0207 | 8.27e-15  |
| rs1545300   | chr1:112464004 | C/T                   | 0.0558        | 0.0073 | 1.481e-14 |
| rs4073778   | chr1:116297758 | A/C                   | 0.0486        | 0.0067 | 4.956e-13 |
| rs10465885  | chr1:147232740 | C/T                   | 0.0302        | 0.0067 | 5.735e-06 |
| rs79187193  | chr1:147255831 | G/A                   | 0.1162        | 0.0153 | 3.15e-14  |
| rs6689306   | chr1:154395946 | A/G                   | 0.046         | 0.0068 | 1.36e-11  |
| rs4999127   | chr1:154714006 | A/G                   | 0.0827        | 0.0098 | 4.279e-17 |
| rs11264280  | chr1:154862952 | T/C                   | 0.1347        | 0.0071 | 3.067e-79 |
| rs72700114  | chr1:170193825 | C/G                   | 0.2021        | 0.013  | 3.288e-54 |
| rs72700118  | chr1:170194823 | A/C                   | 0.1227        | 0.0101 | 9.524e-34 |
| rs577676    | chr1:170587340 | C/T                   | 0.0923        | 0.0067 | 1.62e-43  |
| rs10753933  | chr1:203026214 | T/G                   | 0.0609        | 0.0067 | 9.844e-20 |
| rs4951258   | chr1:205691316 | A/G                   | 0.0376        | 0.0067 | 2.104e-08 |
| rs7578393   | chr2:26165528  | T/C                   | 0.0614        | 0.0088 | 2.42e-12  |
| rs11689011  | chr2:46541176  | T/C                   | 0.0321        | 0.0103 | 3.124e-08 |
| rs11125871  | chr2:61470126  | C/T                   | 0.0394        | 0.0068 | 6.416e-09 |
| rs2540949   | chr2:65284231  | A/T                   | 0.0659        | 0.0068 | 2.949e-22 |
| rs6747542   | chr2:70106832  | T/C                   | 0.0554        | 0.0067 | 1.096e-16 |
| rs72926475  | chr2:86594487  | G/A                   | 0.0683        | 0.0102 | 2.372e-11 |
| rs28387148  | chr2:127433465 | T/C                   | 0.0741        | 0.0113 | 6.251e-11 |
| rs67969609  | chr2:145760353 | G/C                   | 0.0711        | 0.0126 | 1.712e-08 |
| rs56181519  | chr2:175555714 | C/T                   | 0.0662        | 0.0077 | 6.463e-18 |
| rs2288327   | chr2:179411665 | G/A                   | 0.0919        | 0.0089 | 7.257e-25 |
| rs3820888   | chr2:201180023 | C/T                   | 0.0684        | 0.0068 | 5.748e-24 |
| rs35544454  | chr2:213266003 | A/T                   | 0.0589        | 0.0087 | 1.1e-11   |
| rs7650482   | chr3:12841804  | G/A                   | 0.0711        | 0.007  | 1.793e-24 |
| rs73041705  | chr3:24463235  | T/C                   | 0.0443        | 0.0073 | 1.546e-09 |
| rs7374540   | chr3:38634142  | A/C                   | 0.0325        | 0.0068 | 1.682e-06 |
| rs7373065   | chr3:38710315  | T/C                   | 0.2024        | 0.0251 | 7.584e-16 |
| rs6790396   | chr3:38771925  | G/C                   | 0.0627        | 0.0068 | 2.401e-20 |
| rs34080181  | chr3:66454191  | G/A                   | 0.0446        | 0.0069 | 1.278e-10 |
| rs17005647  | chr3:69406181  | T/C                   | 0.0413        | 0.0069 | 2.698e-09 |
| rs6771054   | chr3:89489529  | T/C                   | 0.0457        | 0.0068 | 2.424e-11 |
| rs10804493  | chr3:111554426 | A/G                   | 0.0558        | 0.007  | 1.629e-15 |
| rs1278493   | chr3:135814009 | G/A                   | 0.0389        | 0.0068 | 8.769e-09 |

|             |                |     |        |        |           |
|-------------|----------------|-----|--------|--------|-----------|
| rs13077048  | chr3:141106954 | T/A | 0.0493 | 0.0104 | 4.75e-10  |
| rs62274627  | chr3:148702947 | A/G | 0.0297 | 0.0109 | 2.458e-08 |
| rs7612445   | chr3:179172979 | T/G | 0.0493 | 0.0084 | 4.808e-09 |
| rs60902112  | chr3:194800853 | T/C | 0.0445 | 0.0079 | 1.719e-08 |
| rs34104130  | chr4:10101300  | G/T | 0.0365 | 0.0112 | 2.552e-11 |
| rs1458038   | chr4:81164723  | T/C | 0.0434 | 0.0072 | 1.735e-09 |
| rs6841049   | chr4:83910712  | T/G | 0.0242 | 0.0103 | 1.954e-08 |
| rs10006327  | chr4:103890980 | C/T | 0.0364 | 0.0067 | 4.423e-08 |
| rs61501369  | chr4:111524629 | T/C | 0.1038 | 0.008  | 4.686e-38 |
| rs6850025   | chr4:111596360 | A/G | 0.1815 | 0.0154 | 4.93e-32  |
| rs67249485  | chr4:111699685 | T/A | 0.3655 | 0.0081 | 7.32e-443 |
| rs3853445   | chr4:111761487 | T/C | 0.1693 | 0.0076 | 3.60e-109 |
| rs79399769  | chr4:111925656 | C/T | 0.1197 | 0.0232 | 2.591e-07 |
| rs1532170   | chr4:112165212 | G/A | 0.0306 | 0.007  | 1.258e-05 |
| rs138311480 | chr4:112454295 | C/T | 0.0739 | 0.0284 | 0.00928   |
| rs114904067 | chr4:112604821 | G/A | 0.082  | 0.0215 | 0.0001364 |
| rs7687819   | chr4:113329345 | A/G | 0.0218 | 0.0079 | 0.00612   |
| rs6829664   | chr4:114448656 | G/A | 0.0556 | 0.0076 | 1.922e-13 |
| rs10213171  | chr4:148937537 | G/C | 0.091  | 0.0134 | 1.323e-11 |
| rs10520260  | chr4:174447349 | A/G | 0.0457 | 0.0073 | 3.362e-10 |
| rs12648245  | chr4:174641184 | T/C | 0.0926 | 0.0127 | 3.454e-13 |
| rs6596717   | chr5:106427609 | C/A | 0.0404 | 0.0068 | 3e-09     |
| rs337705    | chr5:113737062 | G/T | 0.0564 | 0.0068 | 1.634e-16 |
| rs2012809   | chr5:128190363 | G/A | 0.0582 | 0.0094 | 4.923e-10 |
| rs2040862   | chr5:137419989 | T/C | 0.1084 | 0.0087 | 1.077e-35 |
| rs17118812  | chr5:139703286 | C/T | 0.0431 | 0.0114 | 1.827e-10 |
| rs6580277   | chr5:142818123 | G/A | 0.067  | 0.0079 | 1.643e-17 |
| rs12188351  | chr5:168386089 | A/G | 0.0865 | 0.0145 | 2.516e-09 |
| rs6891790   | chr5:172670745 | G/T | 0.0729 | 0.0076 | 4.531e-22 |
| rs28439930  | chr5:173393111 | G/C | 0.0458 | 0.0068 | 1.186e-11 |
| rs73366713  | chr6:16415751  | G/A | 0.1035 | 0.0099 | 1.531e-25 |
| rs2308655   | chr6:31322303  | C/G | 0.0494 | 0.012  | 8.085e-09 |
| rs3176326   | chr6:36647289  | G/A | 0.0626 | 0.0085 | 1.424e-13 |
| rs12211255  | chr6:76188330  | A/C | 0.057  | 0.0159 | 2.596e-10 |
| rs2031522   | chr6:87821501  | A/G | 0.0436 | 0.0068 | 1.465e-10 |
| rs3951016   | chr6:118559658 | A/T | 0.0648 | 0.0067 | 2.149e-22 |
| rs9401451   | chr6:122099152 | G/A | 0.0733 | 0.011  | 2.513e-11 |
| rs13195459  | chr6:122403559 | G/A | 0.0623 | 0.007  | 4.152e-19 |
| rs4896104   | chr6:135119089 | C/T | 0.0421 | 0.0103 | 8.615e-10 |
| rs117984853 | chr6:149399100 | T/G | 0.1228 | 0.012  | 1.342e-24 |
| rs12700233  | chr7:904757    | T/G | 0.0367 | 0.0104 | 5.204e-11 |
| rs55734480  | chr7:14372009  | A/G | 0.0548 | 0.0078 | 2.201e-12 |
| rs6462079   | chr7:28415827  | A/G | 0.0466 | 0.0076 | 8.793e-10 |

|             |                 |     |        |        |           |
|-------------|-----------------|-----|--------|--------|-----------|
| rs35005436  | chr7:74134911   | C/T | 0.0612 | 0.0097 | 3.342e-10 |
| rs56201652  | chr7:92278116   | G/A | 0.0531 | 0.0075 | 1.743e-12 |
| rs2283038   | chr7:106835410  | T/C | 0.0266 | 0.012  | 9.756e-10 |
| rs11773845  | chr7:116191301  | A/C | 0.1054 | 0.0067 | 2.39e-55  |
| rs55985730  | chr7:128417044  | G/T | 0.0867 | 0.0149 | 5.236e-09 |
| rs7789146   | chr7:150661409  | G/A | 0.0584 | 0.0087 | 2.116e-11 |
| rs35620480  | chr8:11499908   | C/A | 0.054  | 0.0092 | 5.152e-09 |
| rs7508      | chr8:17913970   | A/G | 0.0711 | 0.0075 | 1.691e-21 |
| rs7834729   | chr8:21821778   | G/T | 0.0653 | 0.0104 | 3.553e-10 |
| rs17430364  | chr8:118863445  | T/A | 0.0425 | 0.0133 | 4.433e-08 |
| rs62521286  | chr8:124551975  | G/A | 0.1202 | 0.0135 | 4.498e-19 |
| rs4871397   | chr8:124635197  | G/C | 0.0756 | 0.0138 | 4.646e-08 |
| rs35006907  | chr8:125859817  | A/C | 0.0083 | 0.0107 | 2.663e-08 |
| rs72721963  | chr8:135798224  | G/A | 0.039  | 0.0174 | 1.907e-09 |
| rs6994744   | chr8:141740868  | C/A | 0.0405 | 0.0066 | 1.095e-09 |
| rs10821415  | chr9:97713459   | A/C | 0.0821 | 0.0067 | 2.924e-34 |
| rs4743034   | chr9:109632353  | A/G | 0.0246 | 0.0122 | 6.139e-09 |
| rs10760361  | chr9:127178266  | G/T | 0.0259 | 0.0106 | 6.035e-10 |
| rs2274115   | chr9:139094773  | G/A | 0.0487 | 0.0076 | 1.691e-10 |
| rs12245149  | chr10:65321147  | C/A | 0.047  | 0.0067 | 1.664e-12 |
| rs7096385   | chr10:69664881  | T/C | 0.0707 | 0.013  | 4.871e-08 |
| rs60212594  | chr10:75414344  | G/C | 0.1176 | 0.0096 | 9.199e-35 |
| rs10458660  | chr10:77936576  | G/A | 0.0537 | 0.0087 | 6.783e-10 |
| rs55693294  | chr10:105277474 | T/C | 0.0546 | 0.0146 | 0.0001819 |
| rs11598047  | chr10:105342672 | G/A | 0.1537 | 0.009  | 8.952e-66 |
| rs35176054  | chr10:105480387 | A/T | 0.1391 | 0.01   | 3.207e-44 |
| rs10749053  | chr10:112576695 | T/C | 0.0555 | 0.0097 | 1.049e-08 |
| rs10741807  | chr11:20011445  | T/C | 0.0729 | 0.0079 | 1.591e-20 |
| rs565449    | chr11:95092398  | G/A | 0.0409 | 0.0109 | 2.235e-09 |
| rs4935786   | chr11:121661507 | T/A | 0.0463 | 0.0079 | 4.854e-09 |
| rs76097649  | chr11:128764570 | A/G | 0.1151 | 0.0124 | 1.26e-20  |
| rs2291437   | chr12:24715048  | G/T | 0.0955 | 0.0104 | 5.052e-20 |
| rs4963776   | chr12:24779491  | G/T | 0.0913 | 0.0088 | 1.839e-25 |
| rs17380837  | chr12:26345526  | C/T | 0.0501 | 0.0072 | 4.799e-12 |
| rs12809354  | chr12:32978437  | C/T | 0.0718 | 0.0094 | 2.886e-14 |
| rs11614818  | chr12:56055815  | C/T | 0.0329 | 0.007  | 2.441e-06 |
| rs2860482   | chr12:57105938  | A/C | 0.054  | 0.0076 | 1.212e-12 |
| rs71454237  | chr12:70013415  | G/A | 0.062  | 0.0084 | 1.784e-13 |
| rs775498    | chr12:70071513  | G/A | 0.0423 | 0.0074 | 1.053e-08 |
| rs12426679  | chr12:76237987  | C/T | 0.0391 | 0.0067 | 4.945e-09 |
| rs883079    | chr12:114793240 | T/C | 0.0981 | 0.0074 | 2.837e-40 |
| rs116904997 | chr12:120668534 | G/A | 0.1116 | 0.0405 | 1.275e-08 |
| rs10773657  | chr12:123327900 | C/A | 0.0575 | 0.0103 | 2.537e-08 |

|             |                 |     |        |        |           |
|-------------|-----------------|-----|--------|--------|-----------|
| rs7134121   | chr12:124447346 | T/C | 0.0317 | 0.0108 | 2.003e-11 |
| rs6560886   | chr12:133150210 | C/T | 0.051  | 0.009  | 1.491e-08 |
| rs9506925   | chr13:23368943  | T/C | 0.0449 | 0.0075 | 2.716e-09 |
| rs1980728   | chr13:47247985  | G/T | 0.0361 | 0.0116 | 2.083e-09 |
| rs35569628  | chr13:113872712 | T/C | 0.0452 | 0.008  | 1.378e-08 |
| rs422068    | chr14:23864804  | C/T | 0.0439 | 0.007  | 3.873e-10 |
| rs1957021   | chr14:32924505  | C/T | 0.0583 | 0.008  | 2.274e-13 |
| rs11156751  | chr14:32990437  | C/T | 0.0719 | 0.0077 | 6.941e-21 |
| rs73241997  | chr14:35173775  | T/C | 0.0733 | 0.0093 | 2.942e-15 |
| rs2738413   | chr14:64679960  | A/G | 0.0778 | 0.0067 | 2.546e-31 |
| rs74884082  | chr14:73249419  | C/T | 0.0493 | 0.0078 | 3.479e-10 |
| rs10873298  | chr14:77426525  | C/T | 0.0401 | 0.0069 | 7.072e-09 |
| rs7170477   | chr15:64103777  | A/G | 0.0393 | 0.0072 | 4.977e-08 |
| rs745636    | chr15:70457720  | G/A | 0.0392 | 0.0122 | 7.159e-10 |
| rs74022964  | chr15:73677264  | T/C | 0.1132 | 0.009  | 3.51e-36  |
| rs12908004  | chr15:80676925  | G/A | 0.0732 | 0.009  | 4.115e-16 |
| rs2759301   | chr15:80994288  | A/G | 0.039  | 0.0067 | 5.038e-09 |
| rs4965430   | chr15:99268850  | C/G | 0.0441 | 0.0069 | 1.258e-10 |
| rs118159104 | chr16:1676804   | G/T | 0.1737 | 0.0325 | 9.275e-08 |
| rs140185678 | chr16:2003016   | A/G | 0.1659 | 0.0218 | 2.434e-14 |
| rs77316573  | chr16:2265271   | T/C | 0.0529 | 0.0089 | 3.265e-09 |
| rs2359171   | chr16:73053022  | A/T | 0.1746 | 0.0086 | 4.65e-91  |
| rs876727    | chr16:73067761  | T/G | 0.084  | 0.0084 | 1.974e-23 |
| rs7225165   | chr17:1309850   | G/A | 0.0655 | 0.0111 | 3.203e-09 |
| rs9899183   | chr17:7452977   | T/C | 0.0452 | 0.0075 | 2.017e-09 |
| rs72811294  | chr17:12618680  | G/C | 0.072  | 0.0106 | 9.67e-12  |
| rs11658278  | chr17:38031164  | T/C | 0.0443 | 0.0067 | 3.465e-11 |
| rs12604076  | chr17:76773638  | T/C | 0.0365 | 0.0066 | 3.627e-08 |
| rs9953366   | chr18:46474192  | C/T | 0.049  | 0.0073 | 1.823e-11 |
| rs9963878   | chr18:48679522  | C/T | 0.0653 | 0.012  | 4.845e-08 |
| rs8088085   | chr18:48708548  | A/C | 0.0365 | 0.0067 | 4.794e-08 |
| rs2974231   | chr19:48170757  | A/G | 0.033  | 0.0104 | 1.107e-09 |
| rs2145274   | chr20:6572014   | A/C | 0.0169 | 0.0231 | 7.469e-12 |
| rs2834618   | chr21:36119111  | T/G | 0.0944 | 0.0112 | 3.412e-17 |
| rs56040242  | chr21:45766944  | A/G | 0.0417 | 0.0121 | 1.264e-08 |
| rs464901    | chr22:18597502  | T/C | 0.0508 | 0.0072 | 1.531e-12 |
| rs133902    | chr22:26164079  | T/C | 0.0419 | 0.0068 | 9.137e-10 |

Taken from: Nielsen JB, et al. Biobank-driven genomic discovery yields new insight into atrial fibrillation biology. Nat Genet. 2018;50(9):1234-1239.

**Supplementary Table 12. Codes used in the UK Biobank study to identify atrial fibrillation cases**

| Data fields               | Field names                                                                            | Data codes                                             | Data code definitions                                                                                                                                                                                                                                                                                                              |
|---------------------------|----------------------------------------------------------------------------------------|--------------------------------------------------------|------------------------------------------------------------------------------------------------------------------------------------------------------------------------------------------------------------------------------------------------------------------------------------------------------------------------------------|
| 20002                     | Non-cancer illness code, self-report                                                   | 1471, 1483                                             | Atrial fibrillation, Atrial flutter                                                                                                                                                                                                                                                                                                |
| 41271                     | Diagnoses - ICD9                                                                       | 4273                                                   | Atrial fibrillation and flutter                                                                                                                                                                                                                                                                                                    |
| 41270,<br>40001,<br>40002 | Diagnoses - ICD10<br>Primary cause of death: ICD10,<br>Secondary cause of death: ICD10 | I48, I48.0,<br>I48.1, I48.2,<br>I48.3, I48.4,<br>I48.9 | Atrial fibrillation and flutter,<br>Paroxysmal atrial fibrillation,<br>Persistent atrial fibrillation, Chronic<br>atrial fibrillation, Typical atrial flutter,<br>Atypical atrial flutter, Atrial fibrillation<br>and atrial flutter, unspecified                                                                                  |
| 41272                     | Operative procedures                                                                   | K62.1, K62.2,<br>K62.3, K62.4                          | Percutaneous transluminal ablation of<br>pulmonary vein to left atrium<br>conducting system, Percutaneous<br>transluminal ablation of atrial wall for<br>atrial flutter, Percutaneous transluminal<br>ablation of conducting system of heart<br>for atrial flutter NEC, Percutaneous<br>transluminal internal cardioversion<br>NEC |



**Supplementary Table 13. The numbers (percentages) of participants with missing covariates**

| Covariates                   | N   | %     |
|------------------------------|-----|-------|
| Any missing covariate        | 721 | 1.15  |
| Age at accelerometry (years) | 0   | 0.00  |
| Female                       | 0   | 0.00  |
| Townsend deprivation index   | 73  | 0.12  |
| Recruitment regions          | 0   | 0.00  |
| Education level              | 178 | 0.28  |
| Season of accelerometer wear | 0   | 0.00  |
| Body mass index categories   | 89  | 0.14  |
| Healthy diet score           | 1   | 0.002 |
| Smoking status               | 108 | 0.17  |
| Alcohol consumption          | 14  | 0.02  |
| Coffee consumption           | 0   | 0.00  |
| Tea consumption              | 37  | 0.06  |
| Hypertension history         | 39  | 0.06  |
| Diabetes history             | 51  | 0.08  |
| Dyslipidemia history         | 0   | 0.00  |
| Sleep efficiency (%)         | 150 | 0.24  |
| Sleep duration               | 150 | 0.24  |
